# Supplementary material for: Role of MoOx/Ni(111) interfacial sites in direct deoxygenation of phenol toward benzene
Source: Royal Society of Chemistry journal article supplement (doi:10.1039/d2cy01529c), 2023-01-01
Supplement: d2cy01529c1.pdf [file d2cy01529c1.pdf]

## Supporting Information

### **Role of MoO<sub>x</sub>/Ni(111) Interfacial Sites in Direct Deoxygenation of Phenol toward Benzene**

Bowen Wu,<sup>‡a</sup> Liwen Li,<sup>‡a</sup> Hua Wang,<sup>a</sup> Jinyu Han,<sup>a</sup> Xinli Zhu,<sup>\*ac</sup> and Qingfeng Ge<sup>\*b</sup>

Email address: [xinlizhu@tju.edu.cn](mailto:xinlizhu@tju.edu.cn) (X.Z.); [gge@chem.siu.edu](mailto:gge@chem.siu.edu) (Q.G.)

### Microkinetic parameter analysis:

The reaction rate constant was calculated according to the transition state theory, and the forward rate constant ( $k_f$ ) was calculated using the formula:

$$k_f = \frac{k_B T}{h} \frac{q_{TS,vib}}{q_{IS,vib}} e^{-\frac{E_a}{k_B T}} \quad (S1)$$

where  $k_B$ ,  $T$  and  $h$  are Boltzmann constant, reaction temperature and the Planck's constant, respectively.  $E_a$  is the ZPE-corrected activation barrier for the forward reaction obtained from DFT calculations, and  $q_{IS,vib}$  and  $q_{TS,vib}$  are the vibrational partition functions for the initial state and the transition state, respectively. The vibration partition function can be calculated according to the formula:

$$q_{vib} = \prod_i \frac{1}{1 - e^{-h\nu_i/k_B T}} \quad (S2)$$

where  $\nu_i$  is the vibrational frequency for each vibrational mode of the adsorbed intermediate,  $i$  runs to  $N - 1$  and  $N$  for the transition state and initial state, respectively. The reverse rate constant ( $k_r$ ) was estimated similarly.

The desorption rate constant ( $k_{des}$ ) can be obtained from the adsorption rate constant ( $k_{ad}$ ) and adsorption equilibrium constant ( $K_{eq}$ ):

$$k_{des} = \frac{k_{ad}}{K_{eq}} \quad (S3)$$

where  $k_{ad}$  was calculated based on the collision theory. For a non-activated adsorption process,  $k_{ad}$  was calculated according to:<sup>54-56</sup>

$$k_{ad} = \frac{S\sigma}{\sqrt{2\pi mk_B T}} \quad (S4)$$

where  $m$ ,  $k_B$  and  $T$  represent the molecular mass, Boltzmann constant and temperature, respectively. The sticking coefficient  $\sigma$  was assumed to be 1.0 for the adsorbing species.  $S$  is the area of each adsorption site. The equilibrium constant ( $K_{eq}$ ) was calculated using:

$$K_{eq} = \frac{(q_{vib})_{A^*}}{(q_{vib}q_{rot}q_{tra})_{A(g)}} e^{-\frac{\Delta E_{ads}}{RT}} \quad (S5)$$

where  $q_{rot}$  and  $q_{tra}$  are the rotation partition function and the translation partition function, respectively. They were calculated using the following equations:

$$q_{rot} = \frac{\sqrt{\pi}}{\sigma} \left(\frac{8\pi^2 k_B T}{h^2}\right)^{\frac{3}{2}} \sqrt{I_x I_y I_z} \quad (S6)$$

$$q_{tra} = \left(\frac{2\pi m k_B T}{h^2}\right)^{\frac{3}{2}} V \quad (S7)$$

where  $\sigma$  is the symmetry coefficient of the desorbed species.  $I_x$  is the moment of inertia of the desorbed species taking the  $x$ -axis direction as the direction of the rotation axis, and  $I_y$  and  $I_z$  are similar.  $V$  is the volume of the translational space of the desorbed species.

**Table S1.** Adsorption energy of phenol and benzene on Ni(111) and Mo<sub>3</sub>O<sub>5</sub>/Ni(111) (with or without vdw)

|                                    | Ni(111) | Mo <sub>3</sub> O <sub>5</sub> /Ni(111) |
|------------------------------------|---------|-----------------------------------------|
| Phenol(with vdw <sup>a</sup> )/eV  | -1.83   | -1.86                                   |
| Phenol(without vdw)/eV             | -0.72   | -0.67                                   |
| Benzene(with vdw <sup>a</sup> )/eV | -1.91   | -2.06                                   |
| Benzene(without vdw)/eV            | -0.86   | -0.83                                   |

<sup>a</sup> Calculated using VDW correction through DFT-D3 method of Grimme with zero-damping function.

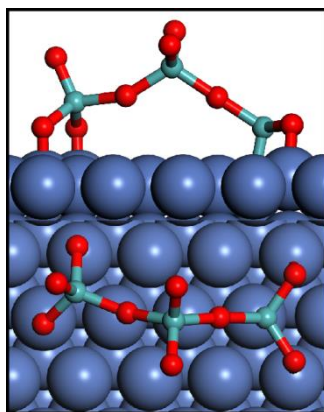

**Fig. S1** The structure of the chain Mo<sub>3</sub>O<sub>9</sub>/Ni(111).

**Table S2.** Core level shift of Mo 3d in Mo<sub>3</sub>O<sub>5</sub>/Ni(111) and Mo<sub>3</sub>O<sub>7</sub>/Ni(111) relative to Mo<sub>3</sub>O<sub>9</sub>/Ni(111) and the comparison of experimental values.

| Calculation <sup>a</sup>                |                              |                                   | Experiment <sup>b</sup> |                                   |
|-----------------------------------------|------------------------------|-----------------------------------|-------------------------|-----------------------------------|
| Species of Mo                           |                              | E <sub>CLS</sub> <sup>c</sup> /eV | The valence of Mo       | E <sub>CLS</sub> <sup>c</sup> /eV |
| Mo <sub>3</sub> O <sub>9</sub> /Ni(111) | Mo                           | 0                                 | Mo <sup>6+</sup>        | 0                                 |
| Mo <sub>3</sub> O <sub>5</sub> /Ni(111) | Mo <sub>ov</sub>             | -4.90                             | Mo <sup>3+</sup>        | -5.50                             |
|                                         | Mo <sub>1</sub> <sup>d</sup> | -3.87                             |                         |                                   |
|                                         | Mo <sub>2</sub> <sup>e</sup> | -3.84                             | Mo <sup>4+</sup>        | -3.30                             |
| Mo <sub>3</sub> O <sub>7</sub> /Ni(111) | Mo <sub>ov</sub>             | -4.67                             | Mo <sup>5+</sup>        | -1.40                             |
|                                         | Mo <sub>1</sub> <sup>d</sup> | -3.20                             |                         |                                   |
|                                         | Mo <sub>2</sub> <sup>e</sup> | -3.08                             |                         |                                   |

a Using the final-state approximation to calculate core energies E<sub>core</sub>.

b From the ref. 24 in the paper.<sup>24</sup>

c Core level shift relative to Mo<sub>3</sub>O<sub>9</sub>/Ni(111) or Mo<sup>6+</sup>.

d The first Mo counterclockwise from Mo<sub>ov</sub>.

e The first Mo clockwise from Mo<sub>ov</sub>.

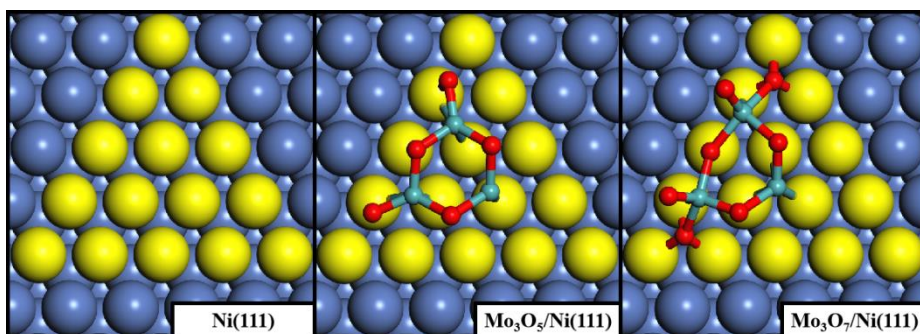

**Fig. S2** The area of the PDOS (yellow atoms for the atoms involved in integration).

**Table S3.** The d band centers and the peak area of the both spin up and down of Ni atoms near the cluster.

| Surface                                 | d-band center (eV) |           | Area of peak |           |
|-----------------------------------------|--------------------|-----------|--------------|-----------|
|                                         | Spin up            | Spin down | Spin up      | Spin down |
| Ni(111)                                 | -1.51              | -0.78     | 72.88        | 72.57     |
| Mo <sub>3</sub> O <sub>5</sub> /Ni(111) | -1.55              | -0.93     | 72.80        | 72.47     |
| Mo <sub>3</sub> O <sub>7</sub> /Ni(111) | -1.58              | -0.98     | 72.80        | 72.54     |

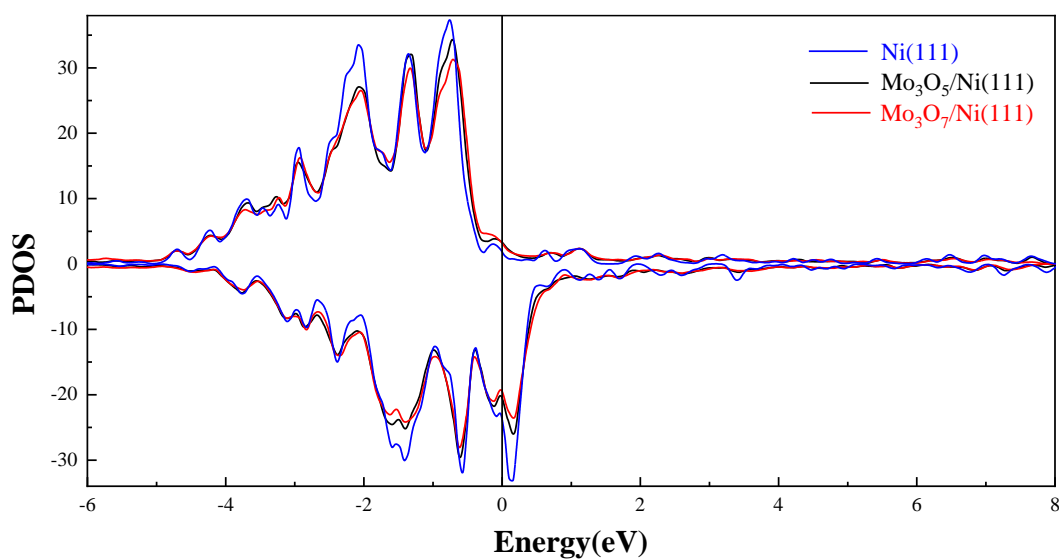

**Fig. S3** PDOS diagram of Ni atoms on the three surfaces.

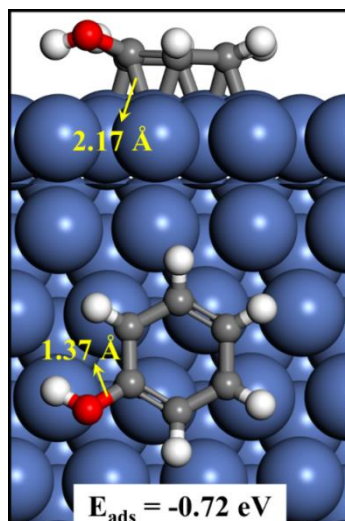

**Fig. S4** The stable adsorption configurations of phenol on Ni(111).

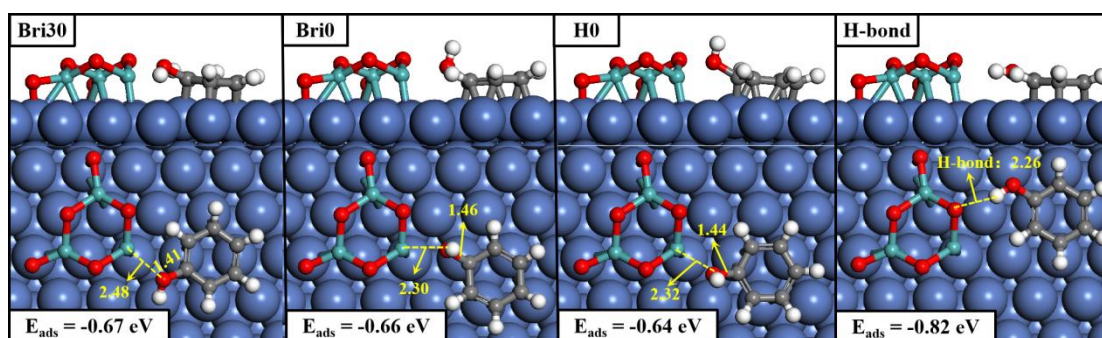

**Fig. S5** Different adsorption configurations and adsorption energy of phenol at the  $\text{Mo}_3\text{O}_5/\text{Ni}(111)$  interface. The yellow number represents the bond length or the distance between two atoms, in Å.

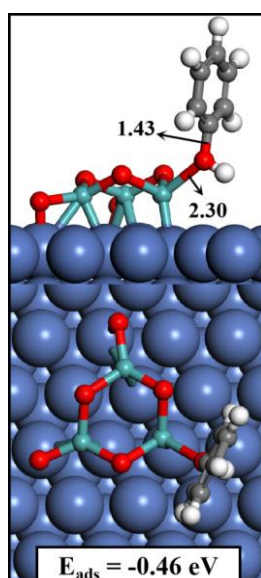

**Fig. S6** Vertical adsorption configuration of phenol on  $\text{Mo}_{\text{ov}}$  at the  $\text{Mo}_3\text{O}_5/\text{Ni}(111)$  interface. The number represents the bond length, in Å.



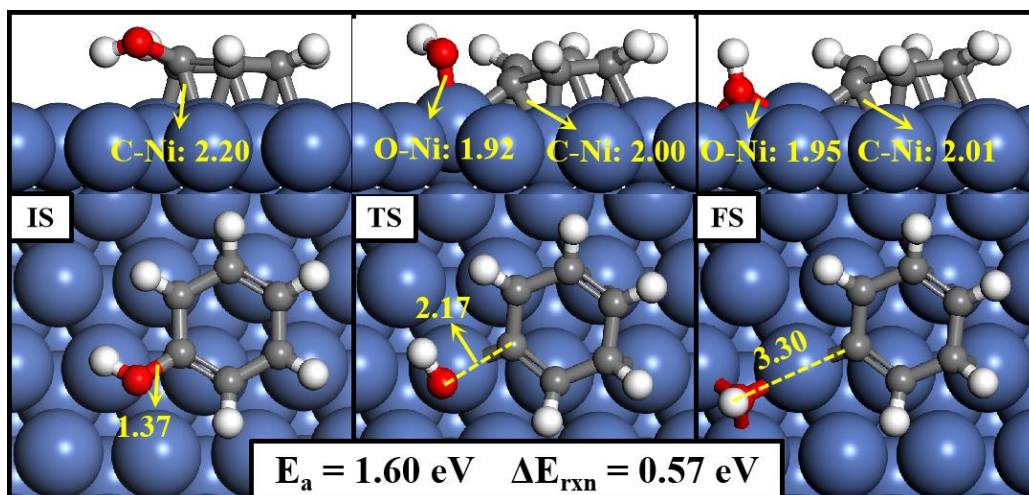

**Fig. S7** Structures of initial state (IS), transition state (TS), and final state (FS) in direct deoxygenation of phenol on 3-layer 6×6 Ni(111) surface.

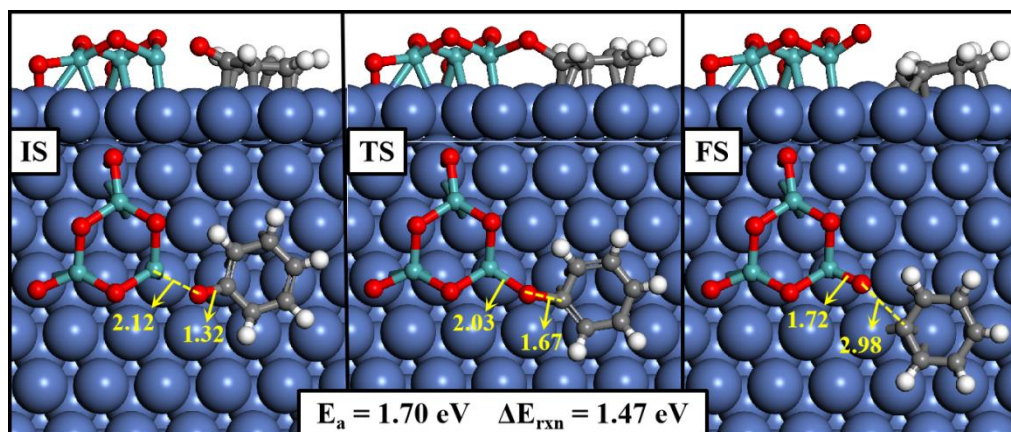

**Fig. S8** Structures of initial state (IS), transition state (TS), and final state (FS) in direct deoxygenation of phenoxy on Ni(111).

## References

24. F. F. Yang, D. Liu, Y. T. Zhao, H. Wang, J. Y. Han, Q. F. Ge and X. L. Zhu, *ACS Catal.*, 2018, **8**, 1672-1682.
54. O. Mamun, E. Walker, M. Faheem, J. Q. Bond and A. Heyden, *ACS Catal.*, 2017, **7**, 215-228.
55. M. Faheem, M. Saleheen, J. M. Lu and A. Heyden, *Catal. Sci. Technol.*, 2016, **6**, 8242-8256.
56. M. K. Sabbe, G. Canduela-Rodriguez, J. F. Joly, M. F. Reyniers and G. B. Marin, *Catal. Sci. Technol.*, 2017, **7**, 5267-5283.

cluster\_mo3o5

1.0000000000000000

|                     |                     |                     |
|---------------------|---------------------|---------------------|
| 14.9507999419999997 | 0.0000000000000000  | 0.0000000000000000  |
| -7.4753999709999999 | 12.9477725567000004 | 0.0000000000000000  |
| 0.0000000000000000  | 0.0000000000000000  | 19.0690994262999993 |

|     |    |   |
|-----|----|---|
| Ni  | Mo | O |
| 108 | 3  | 5 |

Selective dynamics

Direct

|                    |                     |                    |   |   |   |
|--------------------|---------------------|--------------------|---|---|---|
| 0.1111000029999971 | 0.0555500019999968  | 0.0018000000000029 | F | F | F |
| 0.0555500019999968 | 0.1111100019999967  | 0.1066899969999966 | F | F | F |
| 0.0001654001751909 | 0.0000357894398695  | 0.2114707332823471 | T | T | T |
| 0.2777900099999968 | 0.0555699989999994  | 0.0017899999999997 | F | F | F |
| 0.2222100050000009 | 0.1111000029999971  | 0.1066799979999971 | F | F | F |
| 0.1643789217770308 | -0.0010100697539792 | 0.2123834313603335 | T | T | T |
| 0.4444499909999990 | 0.0555500019999968  | 0.0018000000000029 | F | F | F |
| 0.3889000120000006 | 0.1111100019999967  | 0.1066799979999971 | F | F | F |
| 0.3292622789352709 | -0.0039285752212164 | 0.2149313503630984 | T | T | T |
| 0.6111000180000019 | 0.0555500019999968  | 0.0018000000000029 | F | F | F |
| 0.5555499789999985 | 0.1111100019999967  | 0.1067000030000003 | F | F | F |
| 0.4994596613521811 | -0.0011245646340786 | 0.2124092513997032 | T | T | T |
| 0.7777900099999968 | 0.0555699989999994  | 0.0017899999999997 | F | F | F |
| 0.7222099900000032 | 0.1111000029999971  | 0.1066799979999971 | F | F | F |
| 0.6681280121760574 | -0.0030070195100031 | 0.2181830130752517 | T | T | T |
| 0.9444500210000015 | 0.0555500019999968  | 0.0018000000000029 | F | F | F |
| 0.8888900279999987 | 0.1111000029999971  | 0.1066799979999971 | F | F | F |
| 0.8353506374667776 | -0.0006076639331222 | 0.2111392911346969 | T | T | T |
| 0.1111199999999997 | 0.2222400010000030  | 0.0018099999999990 | F | F | F |
| 0.0555599999999998 | 0.2777799959999996  | 0.1067200009999993 | F | F | F |
| 0.0005330817318122 | 0.1670772733562716  | 0.2114464911620815 | T | T | T |
| 0.2777900099999968 | 0.2222200040000004  | 0.0017899999999997 | F | F | F |
| 0.2222200040000004 | 0.2777799959999996  | 0.1067200009999993 | F | F | F |
| 0.1664923378522729 | 0.1672346394506014  | 0.2113181088305460 | T | T | T |
| 0.4444299939999965 | 0.2222100050000009  | 0.0017899999999997 | F | F | F |
| 0.3889000120000006 | 0.2777900099999968  | 0.1066799979999971 | F | F | F |
| 0.3338324587382377 | 0.1692602976892298  | 0.2110324170022161 | T | T | T |
| 0.6111199859999985 | 0.2222400010000030  | 0.0018099999999990 | F | F | F |
| 0.5555599930000028 | 0.2777799959999996  | 0.1067200009999993 | F | F | F |
| 0.5018960193994245 | 0.1683898460676782  | 0.2155842265939716 | T | T | T |
| 0.7777799959999996 | 0.2222100050000009  | 0.0017899999999997 | F | F | F |
| 0.7222200040000004 | 0.2777799959999996  | 0.1067200009999993 | F | F | F |
| 0.6667390070319708 | 0.1686527097038591  | 0.2130803459997935 | T | T | T |
| 0.9444299940000036 | 0.2222100050000009  | 0.0017899999999997 | F | F | F |
| 0.8888999819999981 | 0.2777900099999968  | 0.1066799979999971 | F | F | F |

|                     |                    |                    |   |   |   |
|---------------------|--------------------|--------------------|---|---|---|
| 0.8351606147490908  | 0.1684533933941867 | 0.2111851973162775 | T | T | T |
| 0.1111199999999997  | 0.3888800140000015 | 0.0018099999999990 | F | F | F |
| 0.0555599999999998  | 0.4444499909999990 | 0.1066899969999966 | F | F | F |
| 0.0003456286674324  | 0.3336606198489767 | 0.2116045319221578 | T | T | T |
| 0.2777599989999970  | 0.3888800140000015 | 0.0018099999999990 | F | F | F |
| 0.2222200040000004  | 0.4444400069999972 | 0.1067200009999993 | F | F | F |
| 0.1668017610615748  | 0.3335696129118272 | 0.2116847494187891 | T | T | T |
| 0.4444499909999990  | 0.3889000120000006 | 0.0018000000000029 | F | F | F |
| 0.3888899980000033  | 0.4444499909999990 | 0.1066899969999966 | F | F | F |
| 0.3334796000691386  | 0.3338015457190611 | 0.2115874106534615 | T | T | T |
| 0.6111199859999985  | 0.3888800140000015 | 0.0018099999999990 | F | F | F |
| 0.5555599930000028  | 0.4444499909999990 | 0.1066899969999966 | F | F | F |
| 0.5006782592746166  | 0.3347434982863092 | 0.2128000547450802 | T | T | T |
| 0.7777600289999995  | 0.3888800140000015 | 0.0018099999999990 | F | F | F |
| 0.7222200040000004  | 0.4444400069999972 | 0.1067200009999993 | F | F | F |
| 0.6684082115376396  | 0.3362486622498944 | 0.2090786366477435 | T | T | T |
| 0.9444500210000015  | 0.3889000120000006 | 0.0018000000000029 | F | F | F |
| 0.8888900279999987  | 0.4444499909999990 | 0.1066899969999966 | F | F | F |
| 0.8340946935050677  | 0.3343544711232113 | 0.2123950153614533 | T | T | T |
| 0.1111000029999971  | 0.5555499789999985 | 0.0018000000000029 | F | F | F |
| 0.0555500019999968  | 0.6111099720000013 | 0.1066899969999966 | F | F | F |
| 0.0000123103748217  | 0.4998998797825048 | 0.2117514471663901 | T | T | T |
| 0.2777900099999968  | 0.5555700059999964 | 0.0017899999999997 | F | F | F |
| 0.2222100050000009  | 0.6111000180000019 | 0.1066799979999971 | F | F | F |
| 0.1665771984703623  | 0.4995688973796430 | 0.2117294520778381 | T | T | T |
| 0.4444499909999990  | 0.5555499789999985 | 0.0018000000000029 | F | F | F |
| 0.3888899980000033  | 0.6111099720000013 | 0.1066799979999971 | F | F | F |
| 0.3331922129167134  | 0.4996930466346475 | 0.2117092975629905 | T | T | T |
| 0.6111000180000019  | 0.5555499789999985 | 0.0018000000000029 | F | F | F |
| 0.5555499789999985  | 0.6111099720000013 | 0.1066899969999966 | F | F | F |
| 0.5000876582130941  | 0.5001275334348577 | 0.2118048757662618 | T | T | T |
| 0.7777900099999968  | 0.5555700059999964 | 0.0017899999999997 | F | F | F |
| 0.7222099900000032  | 0.6111000180000019 | 0.1066799979999971 | F | F | F |
| 0.6669371071307594  | 0.5003193709673839 | 0.2127655075772499 | T | T | T |
| 0.9444500210000015  | 0.5555499789999985 | 0.0018000000000029 | F | F | F |
| 0.8888900279999987  | 0.6111099720000013 | 0.1066799979999971 | F | F | F |
| 0.8334494647146019  | 0.5003698745966045 | 0.2124695202283637 | T | T | T |
| 0.1111199999999997  | 0.7222399710000005 | 0.0018099999999990 | F | F | F |
| 0.0555599999999998  | 0.7777799959999996 | 0.1067200009999993 | F | F | F |
| -0.0008796145230915 | 0.6656843012002690 | 0.2116475723504635 | T | T | T |
| 0.2777900099999968  | 0.7222099900000032 | 0.0017899999999997 | F | F | F |
| 0.2222200040000004  | 0.7777799959999996 | 0.1067200009999993 | F | F | F |
| 0.1659577782027847  | 0.6653164545396656 | 0.2116875206526078 | T | T | T |
| 0.4444299939999965  | 0.7222200040000004 | 0.0017899999999997 | F | F | F |



|                    |                    |                    |   |   |   |
|--------------------|--------------------|--------------------|---|---|---|
| 0.3889000120000006 | 0.7777900099999968 | 0.1066799979999971 | F | F | F |
| 0.3328983564442385 | 0.6655779828420568 | 0.2116173103966019 | T | T | T |
| 0.6111199859999985 | 0.7222399710000005 | 0.0018099999999990 | F | F | F |
| 0.5555599930000028 | 0.7777799959999996 | 0.1067200009999993 | F | F | F |
| 0.4996859391696511 | 0.6656960972088246 | 0.2116511742641477 | T | T | T |
| 0.7777799959999996 | 0.7222200040000004 | 0.0017899999999997 | F | F | F |
| 0.7222200040000004 | 0.7777799959999996 | 0.1067200009999993 | F | F | F |
| 0.6665993154796714 | 0.6660125548444309 | 0.2116489915415993 | T | T | T |
| 0.9444299940000036 | 0.7222099900000032 | 0.0017899999999997 | F | F | F |
| 0.8888999819999981 | 0.7777900099999968 | 0.1066799979999971 | F | F | F |
| 0.8331511977600475 | 0.6664846526987459 | 0.2117356504020639 | T | T | T |
| 0.1111199999999997 | 0.8888800140000015 | 0.0018099999999990 | F | F | F |
| 0.0555500019999968 | 0.9444400069999972 | 0.1067000030000003 | F | F | F |
| 0.9988218899186518 | 0.8323139454769135 | 0.2115503947138590 | T | T | T |
| 0.2777599989999970 | 0.8888800140000015 | 0.0018099999999990 | F | F | F |
| 0.2222200040000004 | 0.9444400069999972 | 0.1067200009999993 | F | F | F |
| 0.1638352572192457 | 0.8297855957499132 | 0.2108334625961709 | T | T | T |
| 0.4444499909999990 | 0.8888999819999981 | 0.0018000000000029 | F | F | F |
| 0.3888899980000033 | 0.9444500210000015 | 0.1066899969999966 | F | F | F |
| 0.3326414921824122 | 0.8307493282106955 | 0.2108430689547698 | T | T | T |
| 0.6111199859999985 | 0.8888800140000015 | 0.0018099999999990 | F | F | F |
| 0.5555499789999985 | 0.9444500210000015 | 0.1066899969999966 | F | F | F |
| 0.4987371316763075 | 0.8311291002714245 | 0.2110152989472737 | T | T | T |
| 0.7777600289999995 | 0.8888800140000015 | 0.0018099999999990 | F | F | F |
| 0.7222200040000004 | 0.9444299940000036 | 0.1067200009999993 | F | F | F |
| 0.6665455379825652 | 0.8308574119511312 | 0.2110369209152208 | T | T | T |
| 0.9444500210000015 | 0.8888999819999981 | 0.0018000000000029 | F | F | F |
| 0.8888900279999987 | 0.9444500210000015 | 0.1067000030000003 | F | F | F |
| 0.8334737677539513 | 0.8326642035644150 | 0.2115907538489733 | T | T | T |
| 0.4241636012098681 | 0.0939863456631037 | 0.3321553282936744 | T | T | T |
| 0.6340357156918331 | 0.2950463239802560 | 0.3346049577418956 | T | T | T |
| 0.6458377065823488 | 0.0929674027737823 | 0.3316771869658630 | T | T | T |
| 0.4902294976623182 | 0.2273282699211250 | 0.3746289184882924 | T | T | T |
| 0.7098119095771909 | 0.2269310322094882 | 0.3737821122430813 | T | T | T |
| 0.5027046595700578 | 0.0292721982064849 | 0.3626605940492650 | T | T | T |
| 0.2870295721239427 | 0.0092516496257575 | 0.3105184137138364 | T | T | T |
| 0.7002005047457827 | 0.0093938572474583 | 0.3194742834014222 | T | T | T |

cluster\_mo3o7

1.0000000000000000

12.3114004134999995 0.0000000000000000 0.0000000000000000

-6.1563490152000000 10.6627649893999994 0.0000000000000000

0.0081683950000000 0.0251212727000000 20.6196825574000009

Ni Mo O

100 3 7

Selective dynamics

Direct

|                     |                     |                    |   |   |   |
|---------------------|---------------------|--------------------|---|---|---|
| 0.0015937355244304  | 0.0029672856011160  | 0.9978571141787285 | F | F | F |
| 0.1349280535331232  | 0.0695442100664252  | 0.0964332334514211 | F | F | F |
| 0.0684163707098144  | 0.1369998202313326  | 0.1994276280647009 | T | T | T |
| -0.0005678758800271 | -0.0011888484421202 | 0.2932402126302057 | T | T | T |
| 0.2015106188845621  | 0.0025660115676303  | 0.9982090472570206 | F | F | F |
| 0.3343424320484871  | 0.0687187453944063  | 0.0968491786262291 | F | F | F |
| 0.2667264886470048  | 0.1349888810190179  | 0.1956387748683903 | T | T | T |
| 0.1977629392303595  | -0.0035877079990981 | 0.2920281727515907 | T | T | T |
| 0.4014463496037308  | 0.0024702051010337  | 0.9988096958743213 | F | F | F |
| 0.5343957643317623  | 0.0684690451232584  | 0.0972318917918642 | F | F | F |
| 0.4678447892525415  | 0.1355957942041483  | 0.1981404601323325 | T | T | T |
| 0.3980671374603331  | -0.0033612427248394 | 0.2930154126402879 | T | T | T |
| 0.6012216665235073  | 0.0022651207501170  | 0.9986552857958770 | F | F | F |
| 0.7345942964607204  | 0.0688235774893045  | 0.0967217093736679 | F | F | F |
| 0.6669867602185650  | 0.1354463889090609  | 0.1981876132384750 | T | T | T |
| 0.5992520985713061  | -0.0026893195271080 | 0.2936266602679699 | T | T | T |
| 0.8011799329426594  | 0.0022978806375207  | 0.9981858171533062 | F | F | F |
| 0.9346022958579212  | 0.0695902527398431  | 0.0963787399723799 | F | F | F |
| 0.8684394882035535  | 0.1347489160933491  | 0.1951568225136053 | T | T | T |
| 0.7988045978029663  | -0.0038200035487375 | 0.2921043631972305 | T | T | T |
| 0.0013419042309906  | 0.2027852575095110  | 0.9990581289432043 | F | F | F |
| 0.1348084379055337  | 0.2698551342465265  | 0.0970587374022998 | F | F | F |
| 0.0669159685456961  | 0.3347495634379808  | 0.1964156243599268 | T | T | T |
| 0.0011112854268789  | 0.1991862324486652  | 0.2998170089913387 | T | T | T |
| 0.2015896709794234  | 0.2027453900356946  | 0.9991513435129207 | F | F | F |
| 0.3343773157108885  | 0.2687954475866547  | 0.0977086281376529 | F | F | F |
| 0.2678913151532182  | 0.3347421447941554  | 0.1963049052483870 | T | T | T |
| 0.1973232251780642  | 0.1990831658853556  | 0.2987277760910239 | T | T | T |
| 0.4013155826643455  | 0.2022547464251687  | 0.9993764926289188 | F | F | F |
| 0.5340667262433314  | 0.2683896779573516  | 0.0976302463589036 | F | F | F |
| 0.4673300873753409  | 0.3346216922582457  | 0.1957294369405154 | T | T | T |
| 0.4001260402604264  | 0.1968906388292275  | 0.2950533480822863 | T | T | T |
| 0.6015971111550229  | 0.2027168810697901  | 0.9999399012514587 | F | F | F |
| 0.7345721731620642  | 0.2684769072000321  | 0.0976624567897417 | F | F | F |
| 0.6665691318269884  | 0.3331368771406221  | 0.1963895321711371 | T | T | T |

|                    |                    |                    |   |   |   |
|--------------------|--------------------|--------------------|---|---|---|
| 0.5988604361024851 | 0.1978196561543424 | 0.3051126863540018 | T | T | T |
| 0.8012371763334656 | 0.2022155106078429 | 0.9991569313064304 | F | F | F |
| 0.9344922480870608 | 0.2690052660049531 | 0.0976451810961407 | F | F | F |
| 0.8676436250189549 | 0.3348045373194535 | 0.1953633797436641 | T | T | T |
| 0.7976819109942641 | 0.1967606885134721 | 0.2933591629482235 | T | T | T |
| 0.0006424211689477 | 0.4020766796969681 | 0.9991198054930450 | F | F | F |
| 0.1343487903935454 | 0.4689749961674252 | 0.0964301214325900 | F | F | F |
| 0.0665207221448468 | 0.5337205174670686 | 0.1968247626888757 | T | T | T |
| 0.0030965845107504 | 0.4065808941313189 | 0.2975994904163792 | T | T | T |
| 0.2011195229829639 | 0.4018827147913129 | 0.9984748440733071 | F | F | F |
| 0.3346863201013974 | 0.4688285944891106 | 0.0964815842940467 | F | F | F |
| 0.2675542953856533 | 0.5349733030942435 | 0.1945258622324738 | T | T | T |
| 0.2030781881076814 | 0.4054386374217038 | 0.2919182592869955 | T | T | T |
| 0.4017857549495218 | 0.4019370300789973 | 0.9992964473094332 | F | F | F |
| 0.5342976520741516 | 0.4681301116132559 | 0.0974756262936651 | F | F | F |
| 0.4672572514808648 | 0.5334907415511649 | 0.1969237560639423 | T | T | T |
| 0.4041185228593013 | 0.4062356935330216 | 0.2971464239387071 | T | T | T |
| 0.6013224183380927 | 0.4024131998278691 | 0.9993988338859978 | F | F | F |
| 0.7344559297954518 | 0.4687162149379276 | 0.0973789326590548 | F | F | F |
| 0.6680703924390063 | 0.5356038540528711 | 0.1949386126421937 | T | T | T |
| 0.6041283091560121 | 0.4040782785573117 | 0.2921994294923687 | T | T | T |
| 0.8016893996145171 | 0.4025224490277850 | 0.9993696473864873 | F | F | F |
| 0.9341502515244287 | 0.4683251265964188 | 0.0973753723281519 | F | F | F |
| 0.8675840815782839 | 0.5355162835668100 | 0.1947374830369749 | T | T | T |
| 0.8004412771301538 | 0.4036267322024642 | 0.2916553616355753 | T | T | T |
| 0.0012912825346021 | 0.6022000057600323 | 0.9977908902587913 | F | F | F |
| 0.1343768598952266 | 0.6680866662621625 | 0.0950295313187937 | F | F | F |
| 0.0672835305347961 | 0.7344869201129263 | 0.1944444137802710 | T | T | T |
| 0.0006281015993310 | 0.6030075772421275 | 0.2939203070455343 | T | T | T |
| 0.2006957624980714 | 0.6010415435028378 | 0.9966859051203372 | F | F | F |
| 0.3337687126591433 | 0.6674162186486257 | 0.0944221031660533 | F | F | F |
| 0.2671691392031109 | 0.7342653389816415 | 0.1940653644876510 | T | T | T |
| 0.2016639713229278 | 0.6030848660824489 | 0.2928754050208713 | T | T | T |
| 0.4008269554586334 | 0.6009393316036196 | 0.9968516560055605 | F | F | F |
| 0.5338910773035721 | 0.6680844749319377 | 0.0952076918844327 | F | F | F |
| 0.4672538524234722 | 0.7343132146214929 | 0.1940618509225222 | T | T | T |
| 0.4017825899320076 | 0.6030590359952088 | 0.2929103821251505 | T | T | T |
| 0.6013278413011562 | 0.6019485087268706 | 0.9979514065206772 | F | F | F |
| 0.7340751507812371 | 0.6683253118015955 | 0.0958886038159292 | F | F | F |
| 0.6672495376514380 | 0.7344922479342032 | 0.1945804982517303 | T | T | T |
| 0.6029259991672572 | 0.6031033463587253 | 0.2941775028270820 | T | T | T |
| 0.8009465729592620 | 0.6013925893888796 | 0.9980453576992829 | F | F | F |
| 0.9345537288335208 | 0.6686207347045183 | 0.0956451480535137 | F | F | F |
| 0.8677444920612409 | 0.7353646076765010 | 0.1939795202709967 | T | T | T |

|                     |                    |                    |   |   |   |
|---------------------|--------------------|--------------------|---|---|---|
| 0.8024217785956695  | 0.6037791923961038 | 0.2945917897475083 | T | T | T |
| 0.0013588973653853  | 0.8020118193581922 | 0.9973972989082114 | F | F | F |
| 0.1345277936195188  | 0.8684519742502701 | 0.0953639449683976 | F | F | F |
| 0.0670311666419841  | 0.9347845243480813 | 0.1943380139175517 | T | T | T |
| -0.0000776575580458 | 0.8004677634957336 | 0.2929299681788431 | T | T | T |
| 0.2017573349696562  | 0.8021767531556989 | 0.9975543897272843 | F | F | F |
| 0.3343228129954312  | 0.8681198832608956 | 0.0957973310232845 | F | F | F |
| 0.2675076407292941  | 0.9347400243348242 | 0.1944610789445971 | T | T | T |
| 0.2000075376706563  | 0.7998429653452512 | 0.2927052770279490 | T | T | T |
| 0.4012821234673751  | 0.8020315704945986 | 0.9977785034166757 | F | F | F |
| 0.5340544904112434  | 0.8682042775104009 | 0.0958031397484689 | F | F | F |
| 0.4674930197706682  | 0.9347158152214697 | 0.1949863610103131 | T | T | T |
| 0.4002814773638633  | 0.8000817794956396 | 0.2926859530558070 | T | T | T |
| 0.6007331633507746  | 0.8018332447500640 | 0.9976327988332301 | F | F | F |
| 0.7340231019997674  | 0.8683545597100633 | 0.0954941355844525 | F | F | F |
| 0.6673152405584203  | 0.9348318516831258 | 0.1945383692126482 | T | T | T |
| 0.6000187534595330  | 0.7999179393363884 | 0.2927804621891981 | T | T | T |
| 0.8009778239988563  | 0.8017598646696982 | 0.9975281489910302 | F | F | F |
| 0.9349310270731195  | 0.8698092836506675 | 0.0946045884108528 | F | F | F |
| 0.8677881123531701  | 0.9346816791748105 | 0.1943621905621906 | T | T | T |
| 0.8007252007627755  | 0.8002286342969922 | 0.2929314032414712 | T | T | T |
| 0.7700174025463563  | 0.2299995537181602 | 0.4118019650442509 | T | T | T |
| 0.7407390064973910  | 0.4839069232695761 | 0.4043358116139052 | T | T | T |
| 0.4633139407039689  | 0.2464605087782585 | 0.4137226757897341 | T | T | T |
| 0.8302751816562309  | 0.4050998800939634 | 0.4404388448296202 | T | T | T |
| 0.5668743576032811  | 0.4063853353052138 | 0.4473161312802297 | T | T | T |
| 0.5878430786140489  | 0.1951546711375391 | 0.4022286862530030 | T | T | T |
| 0.7607158889180318  | 0.1305332957504065 | 0.4722442423614213 | T | T | T |
| 0.3637696819895737  | 0.1435310164262931 | 0.4706630386804524 | T | T | T |
| 0.3426807005841712  | 0.2725020557695363 | 0.3610360495509480 | T | T | T |
| 0.9292793783954475  | 0.2730822604237346 | 0.3592962629073142 | T | T | T |

phenol\_ddo\_mo3o5\_is

1.0000000000000000

14.9507999419999997 0.0000000000000000 0.0000000000000000

-7.4753999709999999 12.9477725567000004 0.0000000000000000

0.0000000000000000 0.0000000000000000 19.0690994262999993

Ni Mo O C H  
108 3 6 6 6

Selective dynamics

Direct

|                    |                    |                    |   |   |   |
|--------------------|--------------------|--------------------|---|---|---|
| 0.1111000029999971 | 0.0555500019999968 | 0.0018000000000029 | F | F | F |
| 0.0555500019999968 | 0.1111100019999967 | 0.1066899969999966 | F | F | F |
| 0.0008698180414642 | 0.0012445050811809 | 0.2115006806722301 | T | T | T |
| 0.2777900099999968 | 0.0555699989999994 | 0.0017899999999997 | F | F | F |
| 0.2222100050000009 | 0.1111000029999971 | 0.1066799979999971 | F | F | F |
| 0.1644304601543619 | 0.9995446260249755 | 0.2125012048763722 | T | T | T |
| 0.4444499909999990 | 0.0555500019999968 | 0.0018000000000029 | F | F | F |
| 0.3889000120000006 | 0.1111100019999967 | 0.1066799979999971 | F | F | F |
| 0.3289656308665944 | 0.9962039060235216 | 0.2148308214042502 | T | T | T |
| 0.6111000180000019 | 0.0555500019999968 | 0.0018000000000029 | F | F | F |
| 0.5555499789999985 | 0.1111100019999967 | 0.1067000030000003 | F | F | F |
| 0.4988985970829812 | 0.9992236235618350 | 0.2124141266425954 | T | T | T |
| 0.7777900099999968 | 0.0555699989999994 | 0.0017899999999997 | F | F | F |
| 0.7222099900000032 | 0.1111000029999971 | 0.1066799979999971 | F | F | F |
| 0.6683779994910464 | 0.9991137656082241 | 0.2178212232961949 | T | T | T |
| 0.9444500210000015 | 0.0555500019999968 | 0.0018000000000029 | F | F | F |
| 0.8888900279999987 | 0.1111000029999971 | 0.1066799979999971 | F | F | F |
| 0.8363608564705970 | 0.0018991736638451 | 0.2109607675332691 | T | T | T |
| 0.1111199999999997 | 0.2222400010000030 | 0.0018099999999990 | F | F | F |
| 0.0555599999999998 | 0.2777799959999996 | 0.1067200009999993 | F | F | F |
| 0.0013283524955559 | 0.1680824478439662 | 0.2115740369733771 | T | T | T |
| 0.2777900099999968 | 0.2222200040000004 | 0.0017899999999997 | F | F | F |
| 0.2222200040000004 | 0.2777799959999996 | 0.1067200009999993 | F | F | F |
| 0.1668983441482747 | 0.1680605809116332 | 0.2114350635131837 | T | T | T |
| 0.4444299939999965 | 0.2222100050000009 | 0.0017899999999997 | F | F | F |
| 0.3889000120000006 | 0.2777900099999968 | 0.1066799979999971 | F | F | F |
| 0.3332713479261094 | 0.1689657249917977 | 0.2109334449347473 | T | T | T |
| 0.6111199859999985 | 0.2222400010000030 | 0.0018099999999990 | F | F | F |
| 0.5555599930000028 | 0.2777799959999996 | 0.1067200009999993 | F | F | F |
| 0.5015617577928239 | 0.1677873580861398 | 0.2161507892243229 | T | T | T |
| 0.7777799959999996 | 0.2222100050000009 | 0.0017899999999997 | F | F | F |
| 0.7222200040000004 | 0.2777799959999996 | 0.1067200009999993 | F | F | F |
| 0.6670112931347609 | 0.1684209447340878 | 0.2133103950362511 | T | T | T |
| 0.9444299940000036 | 0.2222100050000009 | 0.0017899999999997 | F | F | F |
| 0.8888999819999981 | 0.2777900099999968 | 0.1066799979999971 | F | F | F |

|                     |                    |                    |   |   |   |
|---------------------|--------------------|--------------------|---|---|---|
| 0.8359149179994150  | 0.1692802964662150 | 0.2112006255213364 | T | T | T |
| 0.1111199999999997  | 0.3888800140000015 | 0.0018099999999990 | F | F | F |
| 0.0555599999999998  | 0.4444499909999990 | 0.1066899969999966 | F | F | F |
| 0.0010800377439937  | 0.3341197043016171 | 0.2117029687504277 | T | T | T |
| 0.2777599989999970  | 0.3888800140000015 | 0.0018099999999990 | F | F | F |
| 0.2222200040000004  | 0.4444400069999972 | 0.1067200009999993 | F | F | F |
| 0.1673394881818384  | 0.3341728895750540 | 0.2116956828459984 | T | T | T |
| 0.4444499909999990  | 0.3889000120000006 | 0.0018000000000029 | F | F | F |
| 0.3888899800000033  | 0.4444499909999990 | 0.1066899969999966 | F | F | F |
| 0.3338249204003561  | 0.3344707282499663 | 0.2112288370030495 | T | T | T |
| 0.6111199859999985  | 0.3888800140000015 | 0.0018099999999990 | F | F | F |
| 0.5555599930000028  | 0.4444499909999990 | 0.1066899969999966 | F | F | F |
| 0.4988961239645009  | 0.3319918858345123 | 0.2113599825429733 | T | T | T |
| 0.7777600289999995  | 0.3888800140000015 | 0.0018099999999990 | F | F | F |
| 0.7222200040000004  | 0.4444400069999972 | 0.1067200009999993 | F | F | F |
| 0.6685112719750186  | 0.3336784947740635 | 0.2076138949604771 | T | T | T |
| 0.9444500210000015  | 0.3889000120000006 | 0.0018000000000029 | F | F | F |
| 0.8888900279999987  | 0.4444499909999990 | 0.1066899969999966 | F | F | F |
| 0.8348414638060696  | 0.3342385058985663 | 0.2122929252330633 | T | T | T |
| 0.1111000029999971  | 0.5555499789999985 | 0.0018000000000029 | F | F | F |
| 0.0555500019999968  | 0.6111099720000013 | 0.1066899969999966 | F | F | F |
| 0.0006326604850355  | 0.5001338339336878 | 0.2120430932051079 | T | T | T |
| 0.2777900099999968  | 0.5555700059999964 | 0.0017899999999997 | F | F | F |
| 0.2222100050000009  | 0.6111000180000019 | 0.1066799979999971 | F | F | F |
| 0.1668154519446391  | 0.5000727857680202 | 0.2118036169467759 | T | T | T |
| 0.4444499909999990  | 0.5555499789999985 | 0.0018000000000029 | F | F | F |
| 0.3888899800000033  | 0.6111099720000013 | 0.1066799979999971 | F | F | F |
| 0.3329319688769080  | 0.5002690754593619 | 0.2112184263643592 | T | T | T |
| 0.6111000180000019  | 0.5555499789999985 | 0.0018000000000029 | F | F | F |
| 0.5555499789999985  | 0.6111099720000013 | 0.1066899969999966 | F | F | F |
| 0.5024975858518439  | 0.5034385174119761 | 0.2183508782232333 | T | T | T |
| 0.7777900099999968  | 0.5555700059999964 | 0.0017899999999997 | F | F | F |
| 0.7222099900000032  | 0.6111000180000019 | 0.1066799979999971 | F | F | F |
| 0.6661153744838574  | 0.4949127564140139 | 0.2232379216136285 | T | T | T |
| 0.9444500210000015  | 0.5555499789999985 | 0.0018000000000029 | F | F | F |
| 0.8888900279999987  | 0.6111099720000013 | 0.1066799979999971 | F | F | F |
| 0.8356262282772130  | 0.4994009302001810 | 0.2097883224208658 | T | T | T |
| 0.1111199999999997  | 0.7222399710000005 | 0.0018099999999990 | F | F | F |
| 0.0555599999999998  | 0.7777799959999996 | 0.1067200009999993 | F | F | F |
| -0.0005538047683830 | 0.6661473996355629 | 0.2115349419124707 | T | T | T |
| 0.2777900099999968  | 0.7222099900000032 | 0.0017899999999997 | F | F | F |
| 0.2222200040000004  | 0.7777799959999996 | 0.1067200009999993 | F | F | F |
| 0.1658446841180110  | 0.6657767257280774 | 0.2118221260085429 | T | T | T |
| 0.4444299939999965  | 0.7222200040000004 | 0.0017899999999997 | F | F | F |

|                     |                    |                    |   |   |   |
|---------------------|--------------------|--------------------|---|---|---|
| 0.3889000120000006  | 0.7777900099999968 | 0.1066799979999971 | F | F | F |
| 0.3322017643225770  | 0.6663412840736119 | 0.2116133076551523 | T | T | T |
| 0.6111199859999985  | 0.7222399710000005 | 0.0018099999999990 | F | F | F |
| 0.5555599930000028  | 0.7777799959999996 | 0.1067200009999993 | F | F | F |
| 0.4973673294711748  | 0.6678918533448840 | 0.2103398196875772 | T | T | T |
| 0.7777799959999996  | 0.7222200040000004 | 0.0017899999999997 | F | F | F |
| 0.7222200040000004  | 0.7777799959999996 | 0.1067200009999993 | F | F | F |
| 0.6671097700542344  | 0.6744318490371618 | 0.2155792608886498 | T | T | T |
| 0.9444299940000036  | 0.7222099900000032 | 0.0017899999999997 | F | F | F |
| 0.8888999819999981  | 0.7777900099999968 | 0.1066799979999971 | F | F | F |
| 0.8321421474362704  | 0.6653785523139616 | 0.2177639984247765 | T | T | T |
| 0.1111199999999997  | 0.8888800140000015 | 0.0018099999999990 | F | F | F |
| 0.0555500019999968  | 0.9444400069999972 | 0.1067000030000003 | F | F | F |
| -0.0001703549770799 | 0.8331277256789069 | 0.2109323756544347 | T | T | T |
| 0.2777599989999970  | 0.8888800140000015 | 0.0018099999999990 | F | F | F |
| 0.2222200040000004  | 0.9444400069999972 | 0.1067200009999993 | F | F | F |
| 0.1638367774419091  | 0.8300840053991005 | 0.2108089216384745 | T | T | T |
| 0.4444499909999990  | 0.8888999819999981 | 0.0018000000000029 | F | F | F |
| 0.3888899980000033  | 0.9444500210000015 | 0.1066899969999966 | F | F | F |
| 0.3322943037682309  | 0.8313013748608395 | 0.2109055507326769 | T | T | T |
| 0.6111199859999985  | 0.8888800140000015 | 0.0018099999999990 | F | F | F |
| 0.5555499789999985  | 0.9444500210000015 | 0.1066899969999966 | F | F | F |
| 0.4979392387037955  | 0.8327468413366260 | 0.2108567571681907 | T | T | T |
| 0.7777600289999995  | 0.8888800140000015 | 0.0018099999999990 | F | F | F |
| 0.7222200040000004  | 0.9444299940000036 | 0.1067200009999993 | F | F | F |
| 0.6665772666961426  | 0.8365952072042417 | 0.2088478457169811 | T | T | T |
| 0.9444500210000015  | 0.8888999819999981 | 0.0018000000000029 | F | F | F |
| 0.8888900279999987  | 0.9444500210000015 | 0.1067000030000003 | F | F | F |
| 0.8354613755453844  | 0.8366149158757364 | 0.2109583332234253 | T | T | T |
| 0.4241600040000009  | 0.0939899979999979 | 0.3321500119999996 | F | F | F |
| 0.6340399979999987  | 0.2950499949999994 | 0.3346000020000020 | T | T | T |
| 0.6458399890000024  | 0.0929699989999975 | 0.3316799999999986 | F | F | F |
| 0.4902299940000034  | 0.2273299989999984 | 0.3746300039999966 | T | T | T |
| 0.7098100190000025  | 0.2269300070000000 | 0.3737800119999974 | T | T | T |
| 0.5026999709999984  | 0.0292700010000004 | 0.3626599910000010 | F | F | F |
| 0.2870300109999988  | 0.0092500000000015 | 0.3105199929999998 | F | F | F |
| 0.7002000210000006  | 0.0093900000000033 | 0.3194699880000016 | F | F | F |
| 0.7571018862075157  | 0.4791743740709848 | 0.3600759579316062 | T | T | T |
| 0.6222195471229885  | 0.6605654038450010 | 0.3184163779288383 | T | T | T |
| 0.5569114497670378  | 0.5493115860166407 | 0.3208041786121690 | T | T | T |
| 0.6073189801620228  | 0.4884115980818709 | 0.3266423201727663 | T | T | T |
| 0.7171329874433816  | 0.5366105211241420 | 0.3281397693084094 | T | T | T |
| 0.7838613244815317  | 0.6469379305739323 | 0.3208251349616368 | T | T | T |
| 0.7327376791907158  | 0.7078874087314299 | 0.3165047285178410 | T | T | T |



|                    |                    |                    |   |   |   |
|--------------------|--------------------|--------------------|---|---|---|
| 0.5885212971086449 | 0.7079259436289562 | 0.3337274371003679 | T | T | T |
| 0.4800500330022920 | 0.5173619943241041 | 0.3442623084674525 | T | T | T |
| 0.5604624044497502 | 0.4114869160042033 | 0.3499383785768228 | T | T | T |
| 0.7786539255467314 | 0.7896877295973472 | 0.3308092667935827 | T | T | T |
| 0.8255263588580862 | 0.5001379956252792 | 0.3389568536983728 | T | T | T |
| 0.8589113501479892 | 0.6815070226155127 | 0.3472358547086414 | T | T | T |

phenol\_ddo\_mo3o5\_ts

1.0000000000000000

14.9507999419999997 0.0000000000000000 0.0000000000000000

-7.4753999709999999 12.9477725567000004 0.0000000000000000

0.0000000000000000 0.0000000000000000 19.0690994262999993

Ni Mo O C H

108 3 6 6 6

Selective dynamics

Direct

|                    |                    |                    |   |   |   |
|--------------------|--------------------|--------------------|---|---|---|
| 0.1111299989999992 | 0.0556700010000029 | 0.0018299999999982 | F | F | F |
| 0.0556500000000000 | 0.1113400010000021 | 0.1067399980000019 | F | F | F |
| 0.0005925493160927 | 0.0015006828524962 | 0.2110595102195688 | T | T | T |
| 0.2777000070000000 | 0.0556900019999986 | 0.0017899999999997 | F | F | F |
| 0.2222799959999975 | 0.1113300029999991 | 0.1067800000000005 | F | F | F |
| 0.1653672375708687 | 0.0005289679963106 | 0.2124815216889460 | T | T | T |
| 0.4441800119999968 | 0.0555999990000018 | 0.0016000000000034 | F | F | F |
| 0.3888399900000010 | 0.1111999969999999 | 0.1067100019999998 | F | F | F |
| 0.3288033259435267 | 0.9958221496567263 | 0.2147173195464994 | T | T | T |
| 0.6107199790000024 | 0.0554400010000009 | 0.0012600000000020 | F | F | F |
| 0.5552800299999987 | 0.1109199970000034 | 0.1063999980000006 | F | F | F |
| 0.4986367648798318 | 0.9985708817543153 | 0.2117841491549163 | T | T | T |
| 0.7774000169999979 | 0.0552800000000033 | 0.0010400000000033 | F | F | F |
| 0.7218199969999972 | 0.1105400029999970 | 0.1060400009999967 | F | F | F |
| 0.6677545015601231 | 0.9973478799412389 | 0.2165402479783494 | T | T | T |
| 0.9442300199999991 | 0.0552800000000033 | 0.0011300000000034 | F | F | F |
| 0.8884900210000026 | 0.1103900000000024 | 0.1059300009999973 | F | F | F |
| 0.8351812054576313 | 0.0005299232546277 | 0.2101845304353008 | T | T | T |
| 0.1111700009999979 | 0.2222999930000000 | 0.0018000000000029 | F | F | F |
| 0.0556199999999976 | 0.2779200080000024 | 0.1066799979999971 | F | F | F |
| 0.0001379839944782 | 0.1674302543339343 | 0.2113099710504190 | T | T | T |
| 0.2778199910000012 | 0.2223200050000003 | 0.0018999999999991 | F | F | F |
| 0.2223300039999998 | 0.2779900130000001 | 0.1067700010000010 | F | F | F |
| 0.1660777244553190 | 0.1676090542865836 | 0.2115196040415179 | T | T | T |
| 0.4443799849999976 | 0.2222899940000005 | 0.0018999999999991 | F | F | F |
| 0.3890399929999973 | 0.2779699860000022 | 0.1068300009999987 | F | F | F |
| 0.3330177730745901 | 0.1686712505859452 | 0.2110653348804418 | T | T | T |
| 0.6109499929999984 | 0.2222400010000030 | 0.0016999999999996 | F | F | F |
| 0.5556200150000024 | 0.2777700130000014 | 0.1068100040000033 | F | F | F |
| 0.5021463339995031 | 0.1677213376725033 | 0.2166070733774542 | T | T | T |
| 0.7774900200000019 | 0.2220100019999975 | 0.0013799999999975 | F | F | F |
| 0.7220399979999996 | 0.2774600090000021 | 0.1064900009999974 | F | F | F |
| 0.6663467910157312 | 0.1674076748379094 | 0.2124494684034167 | T | T | T |
| 0.9440900090000000 | 0.2218600060000000 | 0.0011599999999987 | F | F | F |
| 0.8886299730000005 | 0.2771300080000003 | 0.1061500010000032 | F | F | F |

|                     |                    |                     |   |   |   |
|---------------------|--------------------|---------------------|---|---|---|
| 0.8348969042547715  | 0.1686802113681389 | 0.2105240633645689  | T | T | T |
| 0.11110000010000007 | 0.3888199929999985 | 0.0016699999999972  | F | F | F |
| 0.0554599990000000  | 0.4444800019999988 | 0.1065199969999995  | F | F | F |
| 0.9995656099466116  | 0.3339817304580947 | 0.2113755654645747  | T | T | T |
| 0.2777299879999973  | 0.3888700010000008 | 0.0017799999999966  | F | F | F |
| 0.2222000060000013  | 0.4445700050000028 | 0.1065699979999977  | F | F | F |
| 0.1659379634748997  | 0.3336584824045899 | 0.2117558451181043  | T | T | T |
| 0.4444899860000007  | 0.3889000120000006 | 0.00189000000000031 | F | F | F |
| 0.3889600039999976  | 0.4446099999999973 | 0.1066500020000021  | F | F | F |
| 0.3319695120429872  | 0.3333571855138400 | 0.2116300064078296  | T | T | T |
| 0.6111699940000008  | 0.3888700010000008 | 0.00193000000000015 | F | F | F |
| 0.5556799769999969  | 0.4444999990000014 | 0.1067600029999980  | F | F | F |
| 0.4972461755235046  | 0.3314048916456779 | 0.2117274832222042  | T | T | T |
| 0.7777299879999973  | 0.3888300059999992 | 0.0018099999999990  | F | F | F |
| 0.7223399880000017  | 0.4443100089999987 | 0.1068800019999969  | F | F | F |
| 0.6667502870110195  | 0.3327124603878421 | 0.2075429138570614  | T | T | T |
| 0.9442700150000007  | 0.3886499999999984 | 0.00153000000000025 | F | F | F |
| 0.8888400200000035  | 0.4441399869999998 | 0.10661000000000034 | F | F | F |
| 0.8335125061302016  | 0.3346355264670840 | 0.2119392800575363  | T | T | T |
| 0.1107399990000033  | 0.5554000139999999 | 0.0015399999999985  | F | F | F |
| 0.0553000009999991  | 0.6110699769999997 | 0.1064700040000019  | F | F | F |
| 0.9977944483454398  | 0.4998435546998707 | 0.2116290757905335  | T | T | T |
| 0.2775200009999992  | 0.5554400090000016 | 0.00151000000000032 | F | F | F |
| 0.2220100019999975  | 0.6111699940000008 | 0.1063100029999973  | F | F | F |
| 0.1652029140759449  | 0.4996530186226031 | 0.2115994366560635  | T | T | T |
| 0.4443199930000006  | 0.5553799870000020 | 0.00159000000000002 | F | F | F |
| 0.3887799979999969  | 0.6112400290000011 | 0.1062999959999971  | F | F | F |
| 0.3311838761932667  | 0.4997096318513652 | 0.2114656441415668  | T | T | T |
| 0.6111099720000013  | 0.5553699729999977 | 0.00175000000000013 | F | F | F |
| 0.5554999710000033  | 0.6111999749999981 | 0.1063600029999989  | F | F | F |
| 0.4961170935368762  | 0.4991517587489485 | 0.2106483939400273  | T | T | T |
| 0.7778999809999974  | 0.5554400090000016 | 0.00195000000000008 | F | F | F |
| 0.7222300170000011  | 0.6110600230000003 | 0.1066500020000021  | F | F | F |
| 0.6612856605661095  | 0.4968612422182176 | 0.2124542287479075  | T | T | T |
| 0.9445199970000004  | 0.5554299949999972 | 0.00198999999999993 | F | F | F |
| 0.8888599870000036  | 0.6110200290000023 | 0.1069499999999977  | F | F | F |
| 0.8251064286921844  | 0.4983420887504501 | 0.2251323155675392  | T | T | T |
| 0.1105400029999970  | 0.7220600249999976 | 0.0015399999999985  | F | F | F |
| 0.0551999990000027  | 0.7777100209999972 | 0.1065599989999981  | F | F | F |
| 0.0017450642472715  | 0.6661738502874549 | 0.2107459782867729  | T | T | T |
| 0.2772899870000032  | 0.7220399979999996 | 0.0013099999999966  | F | F | F |
| 0.2219100000000012  | 0.7778099780000005 | 0.10627000000000021 | F | F | F |
| 0.1658042968326681  | 0.6652084509326727 | 0.2114002649417386  | T | T | T |
| 0.4440500139999983  | 0.7219600080000035 | 0.00122000000000036 | F | F | F |

|                    |                    |                    |   |   |   |
|--------------------|--------------------|--------------------|---|---|---|
| 0.3886399869999977 | 0.7778999809999974 | 0.1059899999999985 | F | F | F |
| 0.3316865449910549 | 0.6657883765615480 | 0.2112635566267669 | T | T | T |
| 0.6109200120000011 | 0.7219100000000012 | 0.0012899999999973 | F | F | F |
| 0.5553399920000004 | 0.7779099939999981 | 0.1059399990000003 | F | F | F |
| 0.4966649040780159 | 0.6665507297209731 | 0.2101730140201536 | T | T | T |
| 0.7777699829999989 | 0.7219200130000019 | 0.0015900000000002 | F | F | F |
| 0.7220399979999996 | 0.7778499719999985 | 0.1060900020000020 | F | F | F |
| 0.6628468205714216 | 0.6675184181103010 | 0.2185110246026900 | T | T | T |
| 0.9445099830000032 | 0.7220100159999987 | 0.0019899999999993 | F | F | F |
| 0.8887400030000023 | 0.7777600289999995 | 0.1066000009999968 | F | F | F |
| 0.8398683118843666 | 0.6727771851211668 | 0.2177747329656439 | T | T | T |
| 0.1104200039999981 | 0.8887100219999979 | 0.0016499999999979 | F | F | F |
| 0.0551300010000020 | 0.9443600179999976 | 0.1066899969999966 | F | F | F |
| 0.0031328095759625 | 0.8364432979252102 | 0.2098472771762604 | T | T | T |
| 0.2770999970000005 | 0.8887100219999979 | 0.0012699999999981 | F | F | F |
| 0.2218199969999972 | 0.9444400069999972 | 0.1063499970000024 | F | F | F |
| 0.1648278783375001 | 0.8302639919990401 | 0.2104849334494770 | T | T | T |
| 0.4438599940000003 | 0.8886200190000011 | 0.0009399999999999 | F | F | F |
| 0.3885099889999992 | 0.9445499779999977 | 0.1058700009999995 | F | F | F |
| 0.3324103881779690 | 0.8309642313264840 | 0.2103722401153149 | T | T | T |
| 0.6106699710000001 | 0.8884599800000004 | 0.0008100000000013 | F | F | F |
| 0.5552300209999999 | 0.9445899720000028 | 0.1055300009999982 | F | F | F |
| 0.4978587864033249 | 0.8317816713242826 | 0.2102139303606072 | T | T | T |
| 0.7774900200000019 | 0.8884199860000024 | 0.0009500000000031 | F | F | F |
| 0.7219899890000008 | 0.9445999860000001 | 0.1055099960000021 | F | F | F |
| 0.6651369742426291 | 0.8327505410443727 | 0.2090237570564415 | T | T | T |
| 0.9442700150000007 | 0.8884599800000004 | 0.0013500000000022 | F | F | F |
| 0.8886600140000027 | 0.9445499779999977 | 0.1058399980000004 | F | F | F |
| 0.8342886938487297 | 0.8353453060215009 | 0.2110967960553777 | T | T | T |
| 0.4239400029999985 | 0.0937699970000025 | 0.3320800070000018 | F | F | F |
| 0.6377458721304977 | 0.2986223194573705 | 0.3344143291160526 | T | T | T |
| 0.6439099910000010 | 0.0897099969999999 | 0.3303399979999995 | F | F | F |
| 0.4913099999999986 | 0.2268400040000031 | 0.3748100099999974 | T | T | T |
| 0.7083299760000017 | 0.2228900049999964 | 0.3731800019999980 | T | T | T |
| 0.5011900069999982 | 0.0272999999999968 | 0.3616600040000009 | F | F | F |
| 0.2867699860000030 | 0.0094399999999979 | 0.3104499880000020 | F | F | F |
| 0.6987400049999977 | 0.0066199999999981 | 0.3181200029999971 | F | F | F |
| 0.7542356192079254 | 0.4384877138978046 | 0.3774977479693392 | T | T | T |
| 0.7160850741426096 | 0.7049186067871888 | 0.3210917020261862 | T | T | T |
| 0.6347491621888056 | 0.5997762057416721 | 0.3201370921333930 | T | T | T |
| 0.6581857674981473 | 0.5171061448779037 | 0.3137311407911061 | T | T | T |
| 0.7655609640877969 | 0.5408272054488769 | 0.3030024098748066 | T | T | T |
| 0.8465735634649936 | 0.6455959538273175 | 0.3199138229870948 | T | T | T |
| 0.8222245060559614 | 0.7268107231001305 | 0.3218019595743313 | T | T | T |

|                    |                    |                    |   |   |   |
|--------------------|--------------------|--------------------|---|---|---|
| 0.7002448091776462 | 0.7641007024031092 | 0.3410872547647659 | T | T | T |
| 0.5586547185287267 | 0.5800607516956138 | 0.3404586184856391 | T | T | T |
| 0.6027940015054527 | 0.4456587014561228 | 0.3407002863571530 | T | T | T |
| 0.8817980609314072 | 0.8032247101601818 | 0.3396470530825204 | T | T | T |
| 0.8200041909274960 | 0.4389895695672162 | 0.3785875685403219 | T | T | T |
| 0.9216636224540007 | 0.6600330403009916 | 0.3387463594014342 | T | T | T |

phenyl\_hy\_mo3o5\_is

1.0000000000000000

14.9507999419999997 0.0000000000000000 0.0000000000000000

-7.4753999709999999 12.9477725567000004 0.0000000000000000

0.0000000000000000 0.0000000000000000 19.0690994262999993

Ni Mo O C H

108 3 6 6 7

Selective dynamics

Direct

|                    |                    |                    |   |   |   |
|--------------------|--------------------|--------------------|---|---|---|
| 0.1111000029999971 | 0.0555500019999968 | 0.0018000000000029 | F | F | F |
| 0.0555500019999968 | 0.1111100019999967 | 0.1066899969999966 | F | F | F |
| 0.0008356310970505 | 0.0013213373404612 | 0.2111428263663119 | T | T | T |
| 0.2777900099999968 | 0.0555699989999994 | 0.0017899999999997 | F | F | F |
| 0.2222100050000009 | 0.1111000029999971 | 0.1066799979999971 | F | F | F |
| 0.1658952557917518 | 0.0007930489880546 | 0.2124143102327718 | T | T | T |
| 0.4444499909999990 | 0.0555500019999968 | 0.0018000000000029 | F | F | F |
| 0.3889000120000006 | 0.1111100019999967 | 0.1066799979999971 | F | F | F |
| 0.3299424920173199 | 0.9968754637171525 | 0.2148680179580269 | T | T | T |
| 0.6111000180000019 | 0.0555500019999968 | 0.0018000000000029 | F | F | F |
| 0.5555499789999985 | 0.1111100019999967 | 0.1067000030000003 | F | F | F |
| 0.4996972586459987 | 0.9997085002087449 | 0.2124014750298328 | T | T | T |
| 0.7777900099999968 | 0.0555699989999994 | 0.0017899999999997 | F | F | F |
| 0.7222099900000032 | 0.1111000029999971 | 0.1066799979999971 | F | F | F |
| 0.6682888715495684 | 0.9983704170288943 | 0.2178634107422334 | T | T | T |
| 0.9444500210000015 | 0.0555500019999968 | 0.0018000000000029 | F | F | F |
| 0.8888900279999987 | 0.1111000029999971 | 0.1066799979999971 | F | F | F |
| 0.8355168635398981 | 0.0001186381850968 | 0.2107755232078274 | T | T | T |
| 0.1111199999999997 | 0.2222400010000030 | 0.0018099999999990 | F | F | F |
| 0.0555599999999998 | 0.2777799959999996 | 0.1067200009999993 | F | F | F |
| 0.0004198134469879 | 0.1672122010357099 | 0.2115399499397915 | T | T | T |
| 0.2777900099999968 | 0.2222200040000004 | 0.0017899999999997 | F | F | F |
| 0.2222200040000004 | 0.2777799959999996 | 0.1067200009999993 | F | F | F |
| 0.1663607131879495 | 0.1675169104856417 | 0.2114855536897372 | T | T | T |
| 0.4444299939999965 | 0.2222100050000009 | 0.0017899999999997 | F | F | F |
| 0.3889000120000006 | 0.2777900099999968 | 0.1066799979999971 | F | F | F |
| 0.3338545167683536 | 0.1695011309637862 | 0.2109953593800955 | T | T | T |
| 0.6111199859999985 | 0.2222400010000030 | 0.0018099999999990 | F | F | F |
| 0.5555599930000028 | 0.2777799959999996 | 0.1067200009999993 | F | F | F |
| 0.5023790246870383 | 0.1690197835856476 | 0.2160880213922789 | T | T | T |
| 0.7777799959999996 | 0.2222100050000009 | 0.0017899999999997 | F | F | F |
| 0.7222200040000004 | 0.2777799959999996 | 0.1067200009999993 | F | F | F |
| 0.6669207883050645 | 0.1696964954643735 | 0.2137287097423538 | T | T | T |
| 0.9444299940000036 | 0.2222100050000009 | 0.0017899999999997 | F | F | F |
| 0.8888999819999981 | 0.2777900099999968 | 0.1066799979999971 | F | F | F |

|                     |                    |                    |   |   |   |
|---------------------|--------------------|--------------------|---|---|---|
| 0.8351316912001229  | 0.1692279608179189 | 0.2110508249035486 | T | T | T |
| 0.1111199999999997  | 0.3888800140000015 | 0.0018099999999990 | F | F | F |
| 0.0555599999999998  | 0.4444499909999990 | 0.1066899969999966 | F | F | F |
| 0.0001908833699532  | 0.3336218365296861 | 0.2114182523574634 | T | T | T |
| 0.2777599989999970  | 0.3888800140000015 | 0.0018099999999990 | F | F | F |
| 0.2222200040000004  | 0.4444400069999972 | 0.1067200009999993 | F | F | F |
| 0.1662297498692697  | 0.3334341800558397 | 0.2117755181160851 | T | T | T |
| 0.4444499909999990  | 0.3889000120000006 | 0.0018000000000029 | F | F | F |
| 0.3888899980000033  | 0.4444499909999990 | 0.1066899969999966 | F | F | F |
| 0.3323166716376877  | 0.3332951408514698 | 0.2115991732032811 | T | T | T |
| 0.6111199859999985  | 0.3888800140000015 | 0.0018099999999990 | F | F | F |
| 0.5555599930000028  | 0.4444499909999990 | 0.1066899969999966 | F | F | F |
| 0.4996102911580551  | 0.3339282069818685 | 0.2122290701845667 | T | T | T |
| 0.7777600289999995  | 0.3888800140000015 | 0.0018099999999990 | F | F | F |
| 0.7222200040000004  | 0.4444400069999972 | 0.1067200009999993 | F | F | F |
| 0.6682153289974564  | 0.3362491462936313 | 0.2102314737745914 | T | T | T |
| 0.9444500210000015  | 0.3889000120000006 | 0.0018000000000029 | F | F | F |
| 0.8888900279999987  | 0.4444499909999990 | 0.1066899969999966 | F | F | F |
| 0.8337146007919158  | 0.3361232405373830 | 0.2131596781316728 | T | T | T |
| 0.1111000029999971  | 0.5555499789999985 | 0.0018000000000029 | F | F | F |
| 0.0555500019999968  | 0.6111099720000013 | 0.1066899969999966 | F | F | F |
| -0.0000174885216952 | 0.4998691560910774 | 0.2131121420608354 | T | T | T |
| 0.2777900099999968  | 0.5555700059999964 | 0.0017899999999997 | F | F | F |
| 0.2222100050000009  | 0.6111000180000019 | 0.1066799979999971 | F | F | F |
| 0.1661068655306065  | 0.4996062536018571 | 0.2116146138470653 | T | T | T |
| 0.4444499909999990  | 0.5555499789999985 | 0.0018000000000029 | F | F | F |
| 0.3888899980000033  | 0.6111099720000013 | 0.1066799979999971 | F | F | F |
| 0.3314831323449541  | 0.4994003648352225 | 0.2116889574344331 | T | T | T |
| 0.6111000180000019  | 0.5555499789999985 | 0.0018000000000029 | F | F | F |
| 0.5555499789999985  | 0.6111099720000013 | 0.1066899969999966 | F | F | F |
| 0.4961347252826339  | 0.4986159623671677 | 0.2106386933642724 | T | T | T |
| 0.7777900099999968  | 0.5555700059999964 | 0.0017899999999997 | F | F | F |
| 0.7222099900000032  | 0.6111000180000019 | 0.1066799979999971 | F | F | F |
| 0.6640927450244550  | 0.5012250121689114 | 0.2150109595630384 | T | T | T |
| 0.9444500210000015  | 0.5555499789999985 | 0.0018000000000029 | F | F | F |
| 0.8888900279999987  | 0.6111099720000013 | 0.1066799979999971 | F | F | F |
| 0.8318126755858654  | 0.5057459699928569 | 0.2337929396837031 | T | T | T |
| 0.1111199999999997  | 0.7222399710000005 | 0.0018099999999990 | F | F | F |
| 0.0555599999999998  | 0.7777799959999996 | 0.1067200009999993 | F | F | F |
| 0.0049539191476464  | 0.6668227575985214 | 0.2107769069006499 | T | T | T |
| 0.2777900099999968  | 0.7222099900000032 | 0.0017899999999997 | F | F | F |
| 0.2222200040000004  | 0.7777799959999996 | 0.1067200009999993 | F | F | F |
| 0.1678383410311393  | 0.6659993464720386 | 0.2116225421427068 | T | T | T |
| 0.4444299939999965  | 0.7222200040000004 | 0.0017899999999997 | F | F | F |



|                    |                    |                    |   |   |   |
|--------------------|--------------------|--------------------|---|---|---|
| 0.3889000120000006 | 0.7777900099999968 | 0.1066799979999971 | F | F | F |
| 0.3324159028924847 | 0.6658165483114884 | 0.2116972494283558 | T | T | T |
| 0.6111199859999985 | 0.7222399710000005 | 0.0018099999999990 | F | F | F |
| 0.5555599930000028 | 0.7777799959999996 | 0.1067200009999993 | F | F | F |
| 0.4964440001094293 | 0.6659217519465440 | 0.2108839865542797 | T | T | T |
| 0.7777799959999996 | 0.7222200040000004 | 0.0017899999999997 | F | F | F |
| 0.7222200040000004 | 0.7777799959999996 | 0.1067200009999993 | F | F | F |
| 0.6608830641070390 | 0.6673404985177215 | 0.2182852820479241 | T | T | T |
| 0.9444299940000036 | 0.7222099900000032 | 0.0017899999999997 | F | F | F |
| 0.8888999819999981 | 0.7777900099999968 | 0.1066799979999971 | F | F | F |
| 0.8396002768648322 | 0.6701483013539641 | 0.2074332947123155 | T | T | T |
| 0.1111199999999997 | 0.8888800140000015 | 0.0018099999999990 | F | F | F |
| 0.0555500019999968 | 0.9444400069999972 | 0.1067000030000003 | F | F | F |
| 0.0035097366795373 | 0.8361151974949597 | 0.2103744216352139 | T | T | T |
| 0.2777599989999970 | 0.8888800140000015 | 0.0018099999999990 | F | F | F |
| 0.2222200040000004 | 0.9444400069999972 | 0.1067200009999993 | F | F | F |
| 0.1664093783982665 | 0.8311669696342885 | 0.2105008831685398 | T | T | T |
| 0.4444499909999990 | 0.8888999819999981 | 0.0018000000000029 | F | F | F |
| 0.3888899980000033 | 0.9444500210000015 | 0.1066899969999966 | F | F | F |
| 0.3335237820094433 | 0.8315815001486795 | 0.2109923325086502 | T | T | T |
| 0.6111199859999985 | 0.8888800140000015 | 0.0018099999999990 | F | F | F |
| 0.5555499789999985 | 0.9444500210000015 | 0.1066899969999966 | F | F | F |
| 0.4983618789438416 | 0.8320109562566718 | 0.2109937496178535 | T | T | T |
| 0.7777600289999995 | 0.8888800140000015 | 0.0018099999999990 | F | F | F |
| 0.7222200040000004 | 0.9444299940000036 | 0.1067200009999993 | F | F | F |
| 0.6654678081667643 | 0.8332715786992638 | 0.2099627820744775 | T | T | T |
| 0.9444500210000015 | 0.8888999819999981 | 0.0018000000000029 | F | F | F |
| 0.8888900279999987 | 0.9444500210000015 | 0.1067000030000003 | F | F | F |
| 0.8344726136440009 | 0.8317497610880217 | 0.2191697069485359 | T | T | T |
| 0.4241600040000009 | 0.0939899979999979 | 0.3321500119999996 | F | F | F |
| 0.6340399979999987 | 0.2950499949999994 | 0.3346000020000020 | T | T | T |
| 0.6458399890000024 | 0.0929699989999975 | 0.3316799999999986 | F | F | F |
| 0.4902299940000034 | 0.2273299989999984 | 0.3746300039999966 | T | T | T |
| 0.7098100190000025 | 0.2269300070000000 | 0.3737800119999974 | T | T | T |
| 0.5026999709999984 | 0.0292700010000004 | 0.3626599910000010 | F | F | F |
| 0.2870300109999988 | 0.0092500000000015 | 0.3105199929999998 | F | F | F |
| 0.7002000210000006 | 0.0093900000000033 | 0.3194699880000016 | F | F | F |
| 0.7254765438199563 | 0.4087046495657133 | 0.3975094720699748 | T | T | T |
| 0.7289762369427731 | 0.7384930203794400 | 0.3211090599682831 | T | T | T |
| 0.6562839063617617 | 0.6296758620138294 | 0.3228072064153459 | T | T | T |
| 0.6903880719697174 | 0.5553036857428897 | 0.3148470183380675 | T | T | T |
| 0.7975998286737462 | 0.5907367364523585 | 0.2955885949779088 | T | T | T |
| 0.8721014504522326 | 0.6992886259110875 | 0.3104659224952252 | T | T | T |
| 0.8380974521957086 | 0.7740569552329234 | 0.3209688530070908 | T | T | T |

|                    |                    |                    |   |   |   |
|--------------------|--------------------|--------------------|---|---|---|
| 0.7036303811599122 | 0.7912094549256210 | 0.3400400189333284 | T | T | T |
| 0.5802812500771942 | 0.6034268818139260 | 0.3459910111051264 | T | T | T |
| 0.6468644403516886 | 0.4832497932959091 | 0.3440539151329395 | T | T | T |
| 0.9514936482058349 | 0.7219146322494193 | 0.3255834207514893 | T | T | T |
| 0.8903005385013363 | 0.8470725783713080 | 0.3470842996008651 | T | T | T |
| 0.7690415352913315 | 0.3892782207461465 | 0.4241774354919843 | T | T | T |
| 0.9247178574160796 | 0.5016946187958892 | 0.2738872331097182 | T | T | T |

phenyl\_hy\_mo3o5\_ts

1.0000000000000000

14.9507999419999997 0.0000000000000000 0.0000000000000000

-7.4753999709999999 12.9477725567000004 0.0000000000000000

0.0000000000000000 0.0000000000000000 19.0690994262999993

Ni Mo O C H

108 3 6 6 7

Selective dynamics

Direct

|                    |                    |                    |   |   |   |
|--------------------|--------------------|--------------------|---|---|---|
| 0.1111000029999971 | 0.0555500019999968 | 0.0018000000000029 | F | F | F |
| 0.0555500019999968 | 0.1111100019999967 | 0.1066899969999966 | F | F | F |
| 0.0008954542817260 | 0.0017076289942547 | 0.2111334525895787 | T | T | T |
| 0.2777900099999968 | 0.0555699989999994 | 0.0017899999999997 | F | F | F |
| 0.2222100050000009 | 0.1111000029999971 | 0.1066799979999971 | F | F | F |
| 0.1657806527964250 | 0.0007584618353995 | 0.2124272800654217 | T | T | T |
| 0.4444499909999990 | 0.0555500019999968 | 0.0018000000000029 | F | F | F |
| 0.3889000120000006 | 0.1111100019999967 | 0.1066799979999971 | F | F | F |
| 0.3296950892110673 | 0.9967382437647746 | 0.2148495554003162 | T | T | T |
| 0.6111000180000019 | 0.0555500019999968 | 0.0018000000000029 | F | F | F |
| 0.5555499789999985 | 0.1111100019999967 | 0.1067000030000003 | F | F | F |
| 0.4994940875149272 | 0.9997909435884670 | 0.2124388356158381 | T | T | T |
| 0.7777900099999968 | 0.0555699989999994 | 0.0017899999999997 | F | F | F |
| 0.7222099900000032 | 0.1111000029999971 | 0.1066799979999971 | F | F | F |
| 0.6682172444154406 | 0.9985378061521450 | 0.2178383853430411 | T | T | T |
| 0.9444500210000015 | 0.0555500019999968 | 0.0018000000000029 | F | F | F |
| 0.8888900279999987 | 0.1111000029999971 | 0.1066799979999971 | F | F | F |
| 0.8354624467772371 | 0.0007196922015088 | 0.2107460148510608 | T | T | T |
| 0.1111199999999997 | 0.2222400010000030 | 0.0018099999999990 | F | F | F |
| 0.0555599999999998 | 0.2777799959999996 | 0.1067200009999993 | F | F | F |
| 0.0004072165646510 | 0.1675275432647112 | 0.2115615076832982 | T | T | T |
| 0.2777900099999968 | 0.2222200040000004 | 0.0017899999999997 | F | F | F |
| 0.2222200040000004 | 0.2777799959999996 | 0.1067200009999993 | F | F | F |
| 0.1663591745606443 | 0.1676119358147449 | 0.2114616147548300 | T | T | T |
| 0.4444299939999965 | 0.2222100050000009 | 0.0017899999999997 | F | F | F |
| 0.3889000120000006 | 0.2777900099999968 | 0.1066799979999971 | F | F | F |
| 0.3338865820221538 | 0.1695657225402397 | 0.2109815913049979 | T | T | T |
| 0.6111199859999985 | 0.2222400010000030 | 0.0018099999999990 | F | F | F |
| 0.5555599930000028 | 0.2777799959999996 | 0.1067200009999993 | F | F | F |
| 0.5023332702869980 | 0.1690372706064102 | 0.2160529762902305 | T | T | T |
| 0.7777799959999996 | 0.2222100050000009 | 0.0017899999999997 | F | F | F |
| 0.7222200040000004 | 0.2777799959999996 | 0.1067200009999993 | F | F | F |
| 0.6667234835671620 | 0.1693932888791212 | 0.2134182512222804 | T | T | T |
| 0.9444299940000036 | 0.2222100050000009 | 0.0017899999999997 | F | F | F |
| 0.8888999819999981 | 0.2777900099999968 | 0.1066799979999971 | F | F | F |

|                     |                    |                    |   |   |   |
|---------------------|--------------------|--------------------|---|---|---|
| 0.8351099851419500  | 0.1694743113239457 | 0.2111051380857643 | T | T | T |
| 0.1111199999999997  | 0.3888800140000015 | 0.0018099999999990 | F | F | F |
| 0.0555599999999998  | 0.4444499909999990 | 0.1066899969999966 | F | F | F |
| -0.0001066170525367 | 0.3341245610746960 | 0.2115531536783253 | T | T | T |
| 0.2777599989999970  | 0.3888800140000015 | 0.0018099999999990 | F | F | F |
| 0.2222200040000004  | 0.4444400069999972 | 0.1067200009999993 | F | F | F |
| 0.1660638094386648  | 0.3334915498373243 | 0.2118370849857125 | T | T | T |
| 0.4444499909999990  | 0.3889000120000006 | 0.0018000000000029 | F | F | F |
| 0.3888899980000033  | 0.4444499909999990 | 0.1066899969999966 | F | F | F |
| 0.3322853412956029  | 0.3333911565497453 | 0.2115941417489312 | T | T | T |
| 0.6111199859999985  | 0.3888800140000015 | 0.0018099999999990 | F | F | F |
| 0.5555599930000028  | 0.4444499909999990 | 0.1066899969999966 | F | F | F |
| 0.4997590502490130  | 0.3339871770014542 | 0.2122769575472607 | T | T | T |
| 0.7777600289999995  | 0.3888800140000015 | 0.0018099999999990 | F | F | F |
| 0.7222200040000004  | 0.4444400069999972 | 0.1067200009999993 | F | F | F |
| 0.6685101328947420  | 0.3364188772263236 | 0.2108460890568562 | T | T | T |
| 0.9444500210000015  | 0.3889000120000006 | 0.0018000000000029 | F | F | F |
| 0.8888900279999987  | 0.4444499909999990 | 0.1066899969999966 | F | F | F |
| 0.8335165117872425  | 0.3362994273663222 | 0.2124866626035935 | T | T | T |
| 0.1111000029999971  | 0.5555499789999985 | 0.0018000000000029 | F | F | F |
| 0.0555500019999968  | 0.6111099720000013 | 0.1066899969999966 | F | F | F |
| -0.0009568508812897 | 0.4999593121147728 | 0.2127934422779522 | T | T | T |
| 0.2777900099999968  | 0.5555700059999964 | 0.0017899999999997 | F | F | F |
| 0.2222100050000009  | 0.6111000180000019 | 0.1066799979999971 | F | F | F |
| 0.1657113470501204  | 0.4996196636197947 | 0.2117082247706193 | T | T | T |
| 0.4444499909999990  | 0.5555499789999985 | 0.0018000000000029 | F | F | F |
| 0.3888899980000033  | 0.6111099720000013 | 0.1066799979999971 | F | F | F |
| 0.3311929775869848  | 0.4993918728258150 | 0.2117257358148571 | T | T | T |
| 0.6111000180000019  | 0.5555499789999985 | 0.0018000000000029 | F | F | F |
| 0.5555499789999985  | 0.6111099720000013 | 0.1066899969999966 | F | F | F |
| 0.4959194612080006  | 0.4988221267541632 | 0.2107275486982603 | T | T | T |
| 0.7777900099999968  | 0.5555700059999964 | 0.0017899999999997 | F | F | F |
| 0.7222099900000032  | 0.6111000180000019 | 0.1066799979999971 | F | F | F |
| 0.6632807629364000  | 0.5011922535421972 | 0.2156907475743707 | T | T | T |
| 0.9444500210000015  | 0.5555499789999985 | 0.0018000000000029 | F | F | F |
| 0.8888900279999987  | 0.6111099720000013 | 0.1066799979999971 | F | F | F |
| 0.8330748483179437  | 0.5078299001887143 | 0.2326877638976092 | T | T | T |
| 0.1111199999999997  | 0.7222399710000005 | 0.0018099999999990 | F | F | F |
| 0.0555599999999998  | 0.7777799959999996 | 0.1067200009999993 | F | F | F |
| 0.0042813783092947  | 0.6663722344707510 | 0.2108730977593780 | T | T | T |
| 0.2777900099999968  | 0.7222099900000032 | 0.0017899999999997 | F | F | F |
| 0.2222200040000004  | 0.7777799959999996 | 0.1067200009999993 | F | F | F |
| 0.1671804968579837  | 0.6657417480771689 | 0.2117212016371817 | T | T | T |
| 0.4444299939999965  | 0.7222200040000004 | 0.0017899999999997 | F | F | F |

|                    |                    |                    |   |   |   |
|--------------------|--------------------|--------------------|---|---|---|
| 0.3889000120000006 | 0.7777900099999968 | 0.1066799979999971 | F | F | F |
| 0.3320411370380525 | 0.6658851643217031 | 0.2117089088719864 | T | T | T |
| 0.6111199859999985 | 0.7222399710000005 | 0.0018099999999990 | F | F | F |
| 0.5555599930000028 | 0.7777799959999996 | 0.1067200009999993 | F | F | F |
| 0.4959755211100053 | 0.6660611101153894 | 0.2107856729850998 | T | T | T |
| 0.7777799959999996 | 0.7222200040000004 | 0.0017899999999997 | F | F | F |
| 0.7222200040000004 | 0.7777799959999996 | 0.1067200009999993 | F | F | F |
| 0.6604556539005484 | 0.6677285647579139 | 0.2180437011622287 | T | T | T |
| 0.9444299940000036 | 0.7222099900000032 | 0.0017899999999997 | F | F | F |
| 0.8888999819999981 | 0.7777900099999968 | 0.1066799979999971 | F | F | F |
| 0.8385541969629228 | 0.6721707499668633 | 0.2070576571494340 | T | T | T |
| 0.1111199999999997 | 0.8888800140000015 | 0.0018099999999990 | F | F | F |
| 0.0555500019999968 | 0.9444400069999972 | 0.1067000030000003 | F | F | F |
| 0.0032610445580402 | 0.8362948365819710 | 0.2104203618996075 | T | T | T |
| 0.2777599989999970 | 0.8888800140000015 | 0.0018099999999990 | F | F | F |
| 0.2222200040000004 | 0.9444400069999972 | 0.1067200009999993 | F | F | F |
| 0.1659073223223045 | 0.8309001115782343 | 0.2104785199053795 | T | T | T |
| 0.4444499909999990 | 0.8888999819999981 | 0.0018000000000029 | F | F | F |
| 0.3888899980000033 | 0.9444500210000015 | 0.1066899969999966 | F | F | F |
| 0.3332174340226823 | 0.8315457668150145 | 0.2109659471106894 | T | T | T |
| 0.6111199859999985 | 0.8888800140000015 | 0.0018099999999990 | F | F | F |
| 0.5555499789999985 | 0.9444500210000015 | 0.1066899969999966 | F | F | F |
| 0.4981581426491678 | 0.8322032754169113 | 0.2109501431993256 | T | T | T |
| 0.7777600289999995 | 0.8888800140000015 | 0.0018099999999990 | F | F | F |
| 0.7222200040000004 | 0.9444299940000036 | 0.1067200009999993 | F | F | F |
| 0.6651751549591000 | 0.8336086881748119 | 0.2099346493958313 | T | T | T |
| 0.9444500210000015 | 0.8888999819999981 | 0.0018000000000029 | F | F | F |
| 0.8888900279999987 | 0.9444500210000015 | 0.1067000030000003 | F | F | F |
| 0.8343347611112626 | 0.8332736524415315 | 0.2183439643444103 | T | T | T |
| 0.4241600040000009 | 0.0939899979999979 | 0.3321500119999996 | F | F | F |
| 0.6364012139676272 | 0.3017415646133656 | 0.3378630611961230 | T | T | T |
| 0.6458399890000024 | 0.0929699989999975 | 0.3316799999999986 | F | F | F |
| 0.4902299940000034 | 0.2273299989999984 | 0.3746300039999966 | T | T | T |
| 0.7098100190000025 | 0.2269300070000000 | 0.3737800119999974 | T | T | T |
| 0.5026999709999984 | 0.0292700010000004 | 0.3626599910000010 | F | F | F |
| 0.2870300109999988 | 0.0092500000000015 | 0.3105199929999998 | F | F | F |
| 0.7002000210000006 | 0.0093900000000033 | 0.3194699880000016 | F | F | F |
| 0.7304871968245861 | 0.4119898589111485 | 0.4022803874261550 | T | T | T |
| 0.7213518727815356 | 0.7331908513796295 | 0.3203950111158702 | T | T | T |
| 0.6541160939054127 | 0.6233486036203156 | 0.3215692427924799 | T | T | T |
| 0.6943986178726236 | 0.5532661296685182 | 0.3150840261266529 | T | T | T |
| 0.8034735888313005 | 0.5955058715372876 | 0.2965940322906059 | T | T | T |
| 0.8722687778536973 | 0.7056589235942539 | 0.3097459716306614 | T | T | T |
| 0.8317966397732942 | 0.7753204181068957 | 0.3198877946089113 | T | T | T |

|                    |                    |                    |   |   |   |
|--------------------|--------------------|--------------------|---|---|---|
| 0.6914970940777229 | 0.7823355196332248 | 0.3392054783972096 | T | T | T |
| 0.5769198137406005 | 0.5927672841221822 | 0.3439969661460369 | T | T | T |
| 0.6561341389498753 | 0.4842884289901799 | 0.3478264449267603 | T | T | T |
| 0.9529995662731888 | 0.7338920157224335 | 0.3243598800614946 | T | T | T |
| 0.8803208380822972 | 0.8489756870060459 | 0.3465506127956242 | T | T | T |
| 0.7704750128986306 | 0.3886071977022238 | 0.4293821711712920 | T | T | T |
| 0.8955067654504461 | 0.5489197452775676 | 0.2985285985703108 | T | T | T |

phenol\_ddo\_mo3o7\_is

1.0000000000000000

14.9507999419999997 0.0000000000000000 0.0000000000000000

-7.4753999709999999 12.9477725567000004 0.0000000000000000

0.0000000000000000 0.0000000000000000 19.0690994262999993

Ni Mo O C H  
108 3 8 6 6

Selective dynamics

Direct

|                    |                    |                    |   |   |   |
|--------------------|--------------------|--------------------|---|---|---|
| 0.1111000029999971 | 0.0555500019999968 | 0.0018000000000029 | F | F | F |
| 0.0555500019999968 | 0.1111100019999967 | 0.1066899969999966 | F | F | F |
| 0.0009755415813348 | 0.0006299489934784 | 0.2110547414881294 | T | T | T |
| 0.2777900099999968 | 0.0555699989999994 | 0.0017899999999997 | F | F | F |
| 0.2222100050000009 | 0.1111000029999971 | 0.1066799979999971 | F | F | F |
| 0.1649896636095607 | 0.9991463059077343 | 0.2165476948235323 | T | T | T |
| 0.4444499909999990 | 0.0555500019999968 | 0.0018000000000029 | F | F | F |
| 0.3889000120000006 | 0.1111100019999967 | 0.1066799979999971 | F | F | F |
| 0.3322911317603618 | 0.9954501564001231 | 0.2105966330865426 | T | T | T |
| 0.6111000180000019 | 0.0555500019999968 | 0.0018000000000029 | F | F | F |
| 0.5555499789999985 | 0.1111100019999967 | 0.1067000030000003 | F | F | F |
| 0.4992339184303495 | 0.9981723969733028 | 0.2203745003198889 | T | T | T |
| 0.7777900099999968 | 0.0555699989999994 | 0.0017899999999997 | F | F | F |
| 0.7222099900000032 | 0.1111000029999971 | 0.1066799979999971 | F | F | F |
| 0.6630358708076981 | 0.9971942574481302 | 0.2123071137847021 | T | T | T |
| 0.9444500210000015 | 0.0555500019999968 | 0.0018000000000029 | F | F | F |
| 0.8888900279999987 | 0.1111000029999971 | 0.1066799979999971 | F | F | F |
| 0.8357600099739980 | 0.0001238981025528 | 0.2151435095169240 | T | T | T |
| 0.1111199999999997 | 0.2222400010000030 | 0.0018099999999990 | F | F | F |
| 0.0555599999999998 | 0.2777799959999996 | 0.1067200009999993 | F | F | F |
| 0.0034503710315900 | 0.1690203268590317 | 0.2109740967758411 | T | T | T |
| 0.2777900099999968 | 0.2222200040000004 | 0.0017899999999997 | F | F | F |
| 0.2222200040000004 | 0.2777799959999996 | 0.1067200009999993 | F | F | F |
| 0.1659583290593916 | 0.1688908604575659 | 0.2110553412602972 | T | T | T |
| 0.4444299939999965 | 0.2222100050000009 | 0.0017899999999997 | F | F | F |
| 0.3889000120000006 | 0.2777900099999968 | 0.1066799979999971 | F | F | F |
| 0.3350521818086156 | 0.1705830666069620 | 0.2148856971169503 | T | T | T |
| 0.6111199859999985 | 0.2222400010000030 | 0.0018099999999990 | F | F | F |
| 0.5555599930000028 | 0.2777799959999996 | 0.1067200009999993 | F | F | F |
| 0.5026571791239312 | 0.1682201195701143 | 0.2101390962472049 | T | T | T |
| 0.7777799959999996 | 0.2222100050000009 | 0.0017899999999997 | F | F | F |
| 0.7222200040000004 | 0.2777799959999996 | 0.1067200009999993 | F | F | F |
| 0.6667005281575169 | 0.1689845962617972 | 0.2107877303976478 | T | T | T |
| 0.9444299940000036 | 0.2222100050000009 | 0.0017899999999997 | F | F | F |
| 0.8888999819999981 | 0.2777900099999968 | 0.1066799979999971 | F | F | F |



|                     |                    |                    |   |   |   |
|---------------------|--------------------|--------------------|---|---|---|
| 0.8358326008446867  | 0.1708174766482264 | 0.2143353406838095 | T | T | T |
| 0.1111199999999997  | 0.3888800140000015 | 0.0018099999999990 | F | F | F |
| 0.0555599999999998  | 0.4444499909999990 | 0.1066899969999966 | F | F | F |
| 0.0011903060626177  | 0.3343595745983339 | 0.2113500525759254 | T | T | T |
| 0.2777599989999970  | 0.3888800140000015 | 0.0018099999999990 | F | F | F |
| 0.2222200040000004  | 0.4444400069999972 | 0.1067200009999993 | F | F | F |
| 0.1679414760222250  | 0.3348460300027526 | 0.2117810570580421 | T | T | T |
| 0.4444499909999990  | 0.3889000120000006 | 0.0018000000000029 | F | F | F |
| 0.3888899980000033  | 0.4444499909999990 | 0.1066899969999966 | F | F | F |
| 0.3339774545827648  | 0.3344063379275359 | 0.2109969118347810 | T | T | T |
| 0.6111199859999985  | 0.3888800140000015 | 0.0018099999999990 | F | F | F |
| 0.5555599930000028  | 0.4444499909999990 | 0.1066899969999966 | F | F | F |
| 0.4990600298248915  | 0.3315053073333061 | 0.2089343149035405 | T | T | T |
| 0.7777600289999995  | 0.3888800140000015 | 0.0018099999999990 | F | F | F |
| 0.7222200040000004  | 0.4444400069999972 | 0.1067200009999993 | F | F | F |
| 0.6686513809403635  | 0.3320782938505286 | 0.2108087071976877 | T | T | T |
| 0.9444500210000015  | 0.3889000120000006 | 0.0018000000000029 | F | F | F |
| 0.8888900279999987  | 0.4444499909999990 | 0.1066899969999966 | F | F | F |
| 0.8346322515052943  | 0.3343763286142232 | 0.2123125691208264 | T | T | T |
| 0.1111000029999971  | 0.5555499789999985 | 0.0018000000000029 | F | F | F |
| 0.0555500019999968  | 0.6111099720000013 | 0.1066899969999966 | F | F | F |
| 0.0007319781729180  | 0.5000800876045745 | 0.2117431990810259 | T | T | T |
| 0.2777900099999968  | 0.5555700059999964 | 0.0017899999999997 | F | F | F |
| 0.2222100050000009  | 0.6111000180000019 | 0.1066799979999971 | F | F | F |
| 0.1667649484506362  | 0.4997408541237254 | 0.2117788522836321 | T | T | T |
| 0.4444499909999990  | 0.5555499789999985 | 0.0018000000000029 | F | F | F |
| 0.3888899980000033  | 0.6111099720000013 | 0.1066799979999971 | F | F | F |
| 0.3333400434750079  | 0.4998794379706351 | 0.2113022616710576 | T | T | T |
| 0.6111000180000019  | 0.5555499789999985 | 0.0018000000000029 | F | F | F |
| 0.5555499789999985  | 0.6111099720000013 | 0.1066899969999966 | F | F | F |
| 0.5025828363488807  | 0.5005541494583913 | 0.2181027226615043 | T | T | T |
| 0.7777900099999968  | 0.5555700059999964 | 0.0017899999999997 | F | F | F |
| 0.7222099900000032  | 0.6111000180000019 | 0.1066799979999971 | F | F | F |
| 0.6675747099471330  | 0.4939996896399249 | 0.2193213139641249 | T | T | T |
| 0.9444500210000015  | 0.5555499789999985 | 0.0018000000000029 | F | F | F |
| 0.8888900279999987  | 0.6111099720000013 | 0.1066799979999971 | F | F | F |
| 0.8353774836840310  | 0.4991452255093205 | 0.2111683041502312 | T | T | T |
| 0.1111199999999997  | 0.7222399710000005 | 0.0018099999999990 | F | F | F |
| 0.0555599999999998  | 0.7777799959999996 | 0.1067200009999993 | F | F | F |
| -0.0001365309489648 | 0.6661300724742378 | 0.2111469371133327 | T | T | T |
| 0.2777900099999968  | 0.7222099900000032 | 0.0017899999999997 | F | F | F |
| 0.2222200040000004  | 0.7777799959999996 | 0.1067200009999993 | F | F | F |
| 0.1659840559307797  | 0.6652357184945524 | 0.2118533937297133 | T | T | T |
| 0.4444299939999965  | 0.7222200040000004 | 0.0017899999999997 | F | F | F |

|                    |                    |                    |   |   |   |
|--------------------|--------------------|--------------------|---|---|---|
| 0.3889000120000006 | 0.7777900099999968 | 0.1066799979999971 | F | F | F |
| 0.3320406162042546 | 0.6655946864921283 | 0.2115804183209275 | T | T | T |
| 0.6111199859999985 | 0.7222399710000005 | 0.0018099999999990 | F | F | F |
| 0.5555599930000028 | 0.7777799959999996 | 0.1067200009999993 | F | F | F |
| 0.4972350733388764 | 0.6664407461237186 | 0.2107251356378103 | T | T | T |
| 0.7777799959999996 | 0.7222200040000004 | 0.0017899999999997 | F | F | F |
| 0.7222200040000004 | 0.7777799959999996 | 0.1067200009999993 | F | F | F |
| 0.6660609343652886 | 0.6720408434461407 | 0.2172215001575312 | T | T | T |
| 0.9444299940000036 | 0.7222099900000032 | 0.0017899999999997 | F | F | F |
| 0.8888999819999981 | 0.7777900099999968 | 0.1066799979999971 | F | F | F |
| 0.8323774424768242 | 0.6667317242885828 | 0.2171346506796228 | T | T | T |
| 0.1111199999999997 | 0.8888800140000015 | 0.0018099999999990 | F | F | F |
| 0.0555500019999968 | 0.9444400069999972 | 0.1067000030000003 | F | F | F |
| 0.0003379992169069 | 0.8332531514057505 | 0.2108933068025292 | T | T | T |
| 0.2777599989999970 | 0.8888800140000015 | 0.0018099999999990 | F | F | F |
| 0.2222200040000004 | 0.9444400069999972 | 0.1067200009999993 | F | F | F |
| 0.1639796781906003 | 0.8291138264766292 | 0.2111895560309029 | T | T | T |
| 0.4444499909999990 | 0.8888999819999981 | 0.0018000000000029 | F | F | F |
| 0.3888899980000033 | 0.9444500210000015 | 0.1066899969999966 | F | F | F |
| 0.3311089145493655 | 0.8302619421536586 | 0.2116476255748151 | T | T | T |
| 0.6111199859999985 | 0.8888800140000015 | 0.0018099999999990 | F | F | F |
| 0.5555499789999985 | 0.9444500210000015 | 0.1066899969999966 | F | F | F |
| 0.4977964900932189 | 0.8306608969823207 | 0.2110502267753081 | T | T | T |
| 0.7777600289999995 | 0.8888800140000015 | 0.0018099999999990 | F | F | F |
| 0.7222200040000004 | 0.9444299940000036 | 0.1067200009999993 | F | F | F |
| 0.6650253793529575 | 0.8333500832734204 | 0.2091659998426043 | T | T | T |
| 0.9444500210000015 | 0.8888999819999981 | 0.0018000000000029 | F | F | F |
| 0.8888900279999987 | 0.9444500210000015 | 0.1067000030000003 | F | F | F |
| 0.8350307797358920 | 0.8357485515301872 | 0.2103013401999946 | T | T | T |
| 0.3862099950000015 | 0.0252100009999978 | 0.3365699949999978 | F | F | F |
| 0.6254069397283126 | 0.2425180816562270 | 0.3343528402539597 | T | T | T |
| 0.6537299749999974 | 0.0397999990000031 | 0.3406400080000012 | F | F | F |
| 0.4810299869999994 | 0.1689800019999979 | 0.3683600130000002 | T | T | T |
| 0.6999099849999979 | 0.1711699960000033 | 0.3778100010000003 | T | T | T |
| 0.5097600220000018 | 0.9990599750000015 | 0.3261699970000009 | F | F | F |
| 0.2878499930000018 | 0.0602600019999997 | 0.2814300060000008 | F | F | F |
| 0.7732499840000031 | 0.0595900009999966 | 0.2837100030000030 | F | F | F |
| 0.6486700179999971 | 0.9545300010000020 | 0.4026600119999983 | F | F | F |
| 0.3127700089999976 | 0.9412000180000035 | 0.4012300070000023 | F | F | F |
| 0.5800973589257655 | 0.3783850204735520 | 0.3551837996923730 | T | T | T |
| 0.7226755682824320 | 0.6967091304416470 | 0.3197324805918347 | T | T | T |
| 0.6120897959809520 | 0.6369364686320734 | 0.3200349046004984 | T | T | T |
| 0.5579826929821535 | 0.5246356757084990 | 0.3213017759388944 | T | T | T |
| 0.6213883922387632 | 0.4767508542509073 | 0.3257620390201315 | T | T | T |

|                    |                    |                    |   |   |   |
|--------------------|--------------------|--------------------|---|---|---|
| 0.7313189163279089 | 0.5352449976427611 | 0.3218588711890806 | T | T | T |
| 0.7847951703923255 | 0.6471243747717534 | 0.3197212552625521 | T | T | T |
| 0.7594486016174836 | 0.7777137272971514 | 0.3360516182033583 | T | T | T |
| 0.5686955162814578 | 0.6744656500029356 | 0.3364371199438095 | T | T | T |
| 0.4824521469352532 | 0.4849866510329930 | 0.3473334842957149 | T | T | T |
| 0.8616895321373689 | 0.6884718331250465 | 0.3435886030988368 | T | T | T |
| 0.5042908673161431 | 0.3376096605081316 | 0.3499682762270730 | T | T | T |
| 0.7743267051395465 | 0.4979566911055228 | 0.3394305102732255 | T | T | T |

phenol\_ddo\_mo3o7\_ts

1.0000000000000000

14.9507999419999997 0.0000000000000000 0.0000000000000000

-7.4753999709999999 12.9477725567000004 0.0000000000000000

0.0000000000000000 0.0000000000000000 19.0690994262999993

Ni Mo O C H

108 3 8 6 6

Selective dynamics

Direct

|                    |                    |                    |   |   |   |
|--------------------|--------------------|--------------------|---|---|---|
| 0.1111000029999971 | 0.0555500019999968 | 0.0018000000000029 | F | F | F |
| 0.0555500019999968 | 0.1111100019999967 | 0.1066899969999966 | F | F | F |
| 0.0012710355498478 | 0.0009031497388312 | 0.2110514534617588 | T | T | T |
| 0.2777900099999968 | 0.0555699989999994 | 0.0017899999999997 | F | F | F |
| 0.2222100050000009 | 0.1111000029999971 | 0.1066799979999971 | F | F | F |
| 0.1657812153845374 | 1.0000301158102356 | 0.2166513825017392 | T | T | T |
| 0.4444499909999990 | 0.0555500019999968 | 0.0018000000000029 | F | F | F |
| 0.3889000120000006 | 0.1111100019999967 | 0.1066799979999971 | F | F | F |
| 0.3325762018398607 | 0.9966741193722615 | 0.2098884324002843 | T | T | T |
| 0.6111000180000019 | 0.0555500019999968 | 0.0018000000000029 | F | F | F |
| 0.5555499789999985 | 0.1111100019999967 | 0.1067000030000003 | F | F | F |
| 0.4993486133225948 | 0.9990071533244650 | 0.2203867522194597 | T | T | T |
| 0.7777900099999968 | 0.0555699989999994 | 0.0017899999999997 | F | F | F |
| 0.7222099900000032 | 0.1111000029999971 | 0.1066799979999971 | F | F | F |
| 0.6630434512123405 | 0.9979188587002454 | 0.2121495065918074 | T | T | T |
| 0.9444500210000015 | 0.0555500019999968 | 0.0018000000000029 | F | F | F |
| 0.8888900279999987 | 0.1111000029999971 | 0.1066799979999971 | F | F | F |
| 0.8358129017207302 | 0.0004370521558302 | 0.2152164127680679 | T | T | T |
| 0.1111199999999997 | 0.2222400010000030 | 0.0018099999999990 | F | F | F |
| 0.0555599999999998 | 0.2777799959999996 | 0.1067200009999993 | F | F | F |
| 0.0035221124212471 | 0.1689907000813488 | 0.2110161364167432 | T | T | T |
| 0.2777900099999968 | 0.2222200040000004 | 0.0017899999999997 | F | F | F |
| 0.2222200040000004 | 0.2777799959999996 | 0.1067200009999993 | F | F | F |
| 0.1665085473059553 | 0.1691509887787143 | 0.2110526907993028 | T | T | T |
| 0.4444299939999965 | 0.2222100050000009 | 0.0017899999999997 | F | F | F |
| 0.3889000120000006 | 0.2777900099999968 | 0.1066799979999971 | F | F | F |
| 0.3373410246532602 | 0.1722860041541659 | 0.2150981029006392 | T | T | T |
| 0.6111199859999985 | 0.2222400010000030 | 0.0018099999999990 | F | F | F |
| 0.5555599930000028 | 0.2777799959999996 | 0.1067200009999993 | F | F | F |
| 0.5037048579401932 | 0.1699334266105509 | 0.2107785773987991 | T | T | T |
| 0.7777799959999996 | 0.2222100050000009 | 0.0017899999999997 | F | F | F |
| 0.7222200040000004 | 0.2777799959999996 | 0.1067200009999993 | F | F | F |
| 0.6670203024779091 | 0.1694519519445865 | 0.2107525557833551 | T | T | T |
| 0.9444299940000036 | 0.2222100050000009 | 0.0017899999999997 | F | F | F |
| 0.8888999819999981 | 0.2777900099999968 | 0.1066799979999971 | F | F | F |

|                    |                    |                    |   |   |   |
|--------------------|--------------------|--------------------|---|---|---|
| 0.8359502437300519 | 0.1709718299462045 | 0.2143223749989238 | T | T | T |
| 0.1111199999999997 | 0.3888800140000015 | 0.0018099999999990 | F | F | F |
| 0.0555599999999998 | 0.4444499909999990 | 0.1066899969999966 | F | F | F |
| 0.0013098896651269 | 0.3344027567482275 | 0.2113689251962510 | T | T | T |
| 0.2777599989999970 | 0.3888800140000015 | 0.0018099999999990 | F | F | F |
| 0.2222200040000004 | 0.4444400069999972 | 0.1067200009999993 | F | F | F |
| 0.1678223083057565 | 0.3348281720021559 | 0.2118518373194743 | T | T | T |
| 0.4444499909999990 | 0.3889000120000006 | 0.0018000000000029 | F | F | F |
| 0.3888899980000033 | 0.4444499909999990 | 0.1066899969999966 | F | F | F |
| 0.3343582136129899 | 0.3346199571820911 | 0.2107539796537918 | T | T | T |
| 0.6111199859999985 | 0.3888800140000015 | 0.0018099999999990 | F | F | F |
| 0.5555599930000028 | 0.4444499909999990 | 0.1066899969999966 | F | F | F |
| 0.5057240825062509 | 0.3387295382716300 | 0.2194378060698442 | T | T | T |
| 0.7777600289999995 | 0.3888800140000015 | 0.0018099999999990 | F | F | F |
| 0.7222200040000004 | 0.4444400069999972 | 0.1067200009999993 | F | F | F |
| 0.6698004763650683 | 0.3324716242682851 | 0.2096424636269958 | T | T | T |
| 0.9444500210000015 | 0.3889000120000006 | 0.0018000000000029 | F | F | F |
| 0.8888900279999987 | 0.4444499909999990 | 0.1066899969999966 | F | F | F |
| 0.8351312026228284 | 0.3344772626670189 | 0.2123183712075715 | T | T | T |
| 0.1111000029999971 | 0.5555499789999985 | 0.0018000000000029 | F | F | F |
| 0.0555500019999968 | 0.6111099720000013 | 0.1066899969999966 | F | F | F |
| 0.0010671151828504 | 0.5002892796966097 | 0.2117685097850877 | T | T | T |
| 0.2777900099999968 | 0.5555700059999964 | 0.0017899999999997 | F | F | F |
| 0.2222100050000009 | 0.6111000180000019 | 0.1066799979999971 | F | F | F |
| 0.1666405446652101 | 0.4998488828988793 | 0.2118389257124787 | T | T | T |
| 0.4444499909999990 | 0.5555499789999985 | 0.0018000000000029 | F | F | F |
| 0.3888899980000033 | 0.6111099720000013 | 0.1066799979999971 | F | F | F |
| 0.3328783588085225 | 0.5000255722230192 | 0.2113109825395722 | T | T | T |
| 0.6111000180000019 | 0.5555499789999985 | 0.0018000000000029 | F | F | F |
| 0.5555499789999985 | 0.6111099720000013 | 0.1066899969999966 | F | F | F |
| 0.5012590346522343 | 0.5026644631522812 | 0.2161792383917651 | T | T | T |
| 0.7777900099999968 | 0.5555700059999964 | 0.0017899999999997 | F | F | F |
| 0.7222099900000032 | 0.6111000180000019 | 0.1066799979999971 | F | F | F |
| 0.6701744882037615 | 0.4984793034748461 | 0.2111925751245189 | T | T | T |
| 0.9444500210000015 | 0.5555499789999985 | 0.0018000000000029 | F | F | F |
| 0.8888900279999987 | 0.6111099720000013 | 0.1066799979999971 | F | F | F |
| 0.8366493985225533 | 0.4996823079422504 | 0.2116910986140842 | T | T | T |
| 0.1111199999999997 | 0.7222399710000005 | 0.0018099999999990 | F | F | F |
| 0.0555599999999998 | 0.7777799959999996 | 0.1067200009999993 | F | F | F |
| 1.0004331764914201 | 0.6666802972470069 | 0.2112318690721076 | T | T | T |
| 0.2777900099999968 | 0.7222099900000032 | 0.0017899999999997 | F | F | F |
| 0.2222200040000004 | 0.7777799959999996 | 0.1067200009999993 | F | F | F |
| 0.1660859197581932 | 0.6654935690575036 | 0.2118581176452776 | T | T | T |
| 0.4444299939999965 | 0.7222200040000004 | 0.0017899999999997 | F | F | F |

|                    |                    |                    |   |   |   |
|--------------------|--------------------|--------------------|---|---|---|
| 0.3889000120000006 | 0.7777900099999968 | 0.1066799979999971 | F | F | F |
| 0.3317628961571386 | 0.6659015225745456 | 0.2115935923503907 | T | T | T |
| 0.6111199859999985 | 0.7222399710000005 | 0.0018099999999990 | F | F | F |
| 0.5555599930000028 | 0.7777799959999996 | 0.1067200009999993 | F | F | F |
| 0.4969656777033593 | 0.6674418139946318 | 0.2108809040309839 | T | T | T |
| 0.7777799959999996 | 0.7222200040000004 | 0.0017899999999997 | F | F | F |
| 0.7222200040000004 | 0.7777799959999996 | 0.1067200009999993 | F | F | F |
| 0.6657684046502381 | 0.6737618851486028 | 0.2183289464856547 | T | T | T |
| 0.9444299940000036 | 0.7222099900000032 | 0.0017899999999997 | F | F | F |
| 0.8888999819999981 | 0.7777900099999968 | 0.1066799979999971 | F | F | F |
| 0.8331618191261723 | 0.6680391807254850 | 0.2178839792483852 | T | T | T |
| 0.1111199999999997 | 0.8888800140000015 | 0.0018099999999990 | F | F | F |
| 0.0555500019999968 | 0.9444400069999972 | 0.1067000030000003 | F | F | F |
| 0.0007473035338437 | 0.8337130790871760 | 0.2110079041294698 | T | T | T |
| 0.2777599989999970 | 0.8888800140000015 | 0.0018099999999990 | F | F | F |
| 0.2222200040000004 | 0.9444400069999972 | 0.1067200009999993 | F | F | F |
| 0.1644077162087260 | 0.8296396959127758 | 0.2111965272270039 | T | T | T |
| 0.4444499909999990 | 0.8888999819999981 | 0.0018000000000029 | F | F | F |
| 0.3888899980000033 | 0.9444500210000015 | 0.1066899969999966 | F | F | F |
| 0.3312947053435132 | 0.8308924587179847 | 0.2116028107129740 | T | T | T |
| 0.6111199859999985 | 0.8888800140000015 | 0.0018099999999990 | F | F | F |
| 0.5555499789999985 | 0.9444500210000015 | 0.1066899969999966 | F | F | F |
| 0.4977957398881503 | 0.8313843977967228 | 0.2110687609667817 | T | T | T |
| 0.7777600289999995 | 0.8888800140000015 | 0.0018099999999990 | F | F | F |
| 0.7222200040000004 | 0.9444299940000036 | 0.1067200009999993 | F | F | F |
| 0.6651361964397540 | 0.8340346966648677 | 0.2093867323533392 | T | T | T |
| 0.9444500210000015 | 0.8888999819999981 | 0.0018000000000029 | F | F | F |
| 0.8888900279999987 | 0.9444500210000015 | 0.1067000030000003 | F | F | F |
| 0.8352566261193927 | 0.8361552377436294 | 0.2103809054806380 | T | T | T |
| 0.3862099950000015 | 0.0252100009999978 | 0.3365699949999978 | F | F | F |
| 0.6214186772077758 | 0.2454900915795784 | 0.3333530250891422 | T | T | T |
| 0.6537299749999974 | 0.0397999990000031 | 0.3406400080000012 | F | F | F |
| 0.4743475409359825 | 0.1640007775543754 | 0.3689002260259688 | T | T | T |
| 0.6935720568385616 | 0.1700200987436217 | 0.3759910966236942 | T | T | T |
| 0.5097600220000018 | 0.9990599750000015 | 0.3261699970000009 | F | F | F |
| 0.2878499930000018 | 0.0602600019999997 | 0.2814300060000008 | F | F | F |
| 0.7732499840000031 | 0.0595900009999966 | 0.2837100030000030 | F | F | F |
| 0.6486700179999971 | 0.9545300010000020 | 0.4026600119999983 | F | F | F |
| 0.3127700089999976 | 0.9412000180000035 | 0.4012300070000023 | F | F | F |
| 0.6074360783972651 | 0.3647272417943777 | 0.3781140373661456 | T | T | T |
| 0.7193745619627344 | 0.6954765140026382 | 0.3219280175942323 | T | T | T |
| 0.6090912608887404 | 0.6343105350811421 | 0.3227339142306259 | T | T | T |
| 0.5552476677531214 | 0.5221575557263278 | 0.3174732915663728 | T | T | T |
| 0.6189162009456334 | 0.4760775617348658 | 0.3035617263568666 | T | T | T |

|                    |                    |                    |   |   |   |
|--------------------|--------------------|--------------------|---|---|---|
| 0.7310821615658616 | 0.5365941436599755 | 0.3110128305650428 | T | T | T |
| 0.7826049505698051 | 0.6472831987625699 | 0.3204275727146410 | T | T | T |
| 0.7551681248567114 | 0.7758797308630458 | 0.3392378663992065 | T | T | T |
| 0.5652136578726326 | 0.6707531045873339 | 0.3404357828010792 | T | T | T |
| 0.4798230046231425 | 0.4781379716277006 | 0.3429930700972053 | T | T | T |
| 0.8573072316946649 | 0.6857098406541112 | 0.3473709350044972 | T | T | T |
| 0.5363100785952383 | 0.3294166922328603 | 0.3960030140753442 | T | T | T |
| 0.7712460839147192 | 0.4968482563071906 | 0.3297294952341019 | T | T | T |

phenyl\_hy\_mo3o7\_is

1.0000000000000000

14.9507999419999997 0.0000000000000000 0.0000000000000000

-7.4753999709999999 12.9477725567000004 0.0000000000000000

0.0000000000000000 0.0000000000000000 19.0690994262999993

Ni Mo O C H

108 3 8 6 7

Selective dynamics

Direct

|                    |                    |                    |   |   |   |
|--------------------|--------------------|--------------------|---|---|---|
| 0.1111000029999971 | 0.0555500019999968 | 0.0018000000000029 | F | F | F |
| 0.0555500019999968 | 0.1111100019999967 | 0.1066899969999966 | F | F | F |
| 0.0011743399730138 | 0.0009175895463246 | 0.2110605930940877 | T | T | T |
| 0.2777900099999968 | 0.0555699989999994 | 0.0017899999999997 | F | F | F |
| 0.2222100050000009 | 0.1111000029999971 | 0.1066799979999971 | F | F | F |
| 0.1659467182148672 | 0.0005484048753224 | 0.2162812272427672 | T | T | T |
| 0.4444499909999990 | 0.0555500019999968 | 0.0018000000000029 | F | F | F |
| 0.3889000120000006 | 0.1111100019999967 | 0.1066799979999971 | F | F | F |
| 0.3329485822321000 | 0.9970627963174514 | 0.2106358405424948 | T | T | T |
| 0.6111000180000019 | 0.0555500019999968 | 0.0018000000000029 | F | F | F |
| 0.5555499789999985 | 0.1111100019999967 | 0.1067000030000003 | F | F | F |
| 0.4997915443030339 | 0.9994949800564584 | 0.2202505910175424 | T | T | T |
| 0.7777900099999968 | 0.0555699989999994 | 0.0017899999999997 | F | F | F |
| 0.7222099900000032 | 0.1111000029999971 | 0.1066799979999971 | F | F | F |
| 0.6632335366644725 | 0.9980895435006291 | 0.2120175417710727 | T | T | T |
| 0.9444500210000015 | 0.0555500019999968 | 0.0018000000000029 | F | F | F |
| 0.8888900279999987 | 0.1111000029999971 | 0.1066799979999971 | F | F | F |
| 0.8357049621139671 | 0.0002642020928758 | 0.2152376864899686 | T | T | T |
| 0.1111199999999997 | 0.2222400010000030 | 0.0018099999999990 | F | F | F |
| 0.0555599999999998 | 0.2777799959999996 | 0.1067200009999993 | F | F | F |
| 0.0033370898305532 | 0.1692168617475633 | 0.2110037700976408 | T | T | T |
| 0.2777900099999968 | 0.2222200040000004 | 0.0017899999999997 | F | F | F |
| 0.2222200040000004 | 0.2777799959999996 | 0.1067200009999993 | F | F | F |
| 0.1658007251115100 | 0.1690177482779202 | 0.2108548964061236 | T | T | T |
| 0.4444299939999965 | 0.2222100050000009 | 0.0017899999999997 | F | F | F |
| 0.3889000120000006 | 0.2777900099999968 | 0.1066799979999971 | F | F | F |
| 0.3393489471999808 | 0.1745704887741583 | 0.2171997256231550 | T | T | T |
| 0.6111199859999985 | 0.2222400010000030 | 0.0018099999999990 | F | F | F |
| 0.5555599930000028 | 0.2777799959999996 | 0.1067200009999993 | F | F | F |
| 0.5041425007409444 | 0.1700704060095092 | 0.2104366746343982 | T | T | T |
| 0.7777799959999996 | 0.2222100050000009 | 0.0017899999999997 | F | F | F |
| 0.7222200040000004 | 0.2777799959999996 | 0.1067200009999993 | F | F | F |
| 0.6669971745310004 | 0.1701383676537204 | 0.2119350821543198 | T | T | T |
| 0.9444299940000036 | 0.2222100050000009 | 0.0017899999999997 | F | F | F |
| 0.8888999819999981 | 0.2777900099999968 | 0.1066799979999971 | F | F | F |



|                    |                    |                    |   |   |   |
|--------------------|--------------------|--------------------|---|---|---|
| 0.8358345774334425 | 0.1710390282086551 | 0.2143251591033805 | T | T | T |
| 0.1111199999999997 | 0.3888800140000015 | 0.0018099999999990 | F | F | F |
| 0.0555599999999998 | 0.4444499909999990 | 0.1066899969999966 | F | F | F |
| 0.0013388863884756 | 0.3346552321930460 | 0.2113231002108576 | T | T | T |
| 0.2777599989999970 | 0.3888800140000015 | 0.0018099999999990 | F | F | F |
| 0.2222200040000004 | 0.4444400069999972 | 0.1067200009999993 | F | F | F |
| 0.1677668777602008 | 0.3351642816629142 | 0.2117189923792280 | T | T | T |
| 0.4444499909999990 | 0.3889000120000006 | 0.0018000000000029 | F | F | F |
| 0.3888899980000033 | 0.4444499909999990 | 0.1066899969999966 | F | F | F |
| 0.3343963678436299 | 0.3357091365882965 | 0.2118006651026897 | T | T | T |
| 0.6111199859999985 | 0.3888800140000015 | 0.0018099999999990 | F | F | F |
| 0.5555599930000028 | 0.4444499909999990 | 0.1066899969999966 | F | F | F |
| 0.5119690552944616 | 0.3423052471721843 | 0.2347056510679300 | T | T | T |
| 0.7777600289999995 | 0.3888800140000015 | 0.0018099999999990 | F | F | F |
| 0.7222200040000004 | 0.4444400069999972 | 0.1067200009999993 | F | F | F |
| 0.6693207964427770 | 0.3319884196021547 | 0.2131586804027625 | T | T | T |
| 0.9444500210000015 | 0.3889000120000006 | 0.0018000000000029 | F | F | F |
| 0.8888900279999987 | 0.4444499909999990 | 0.1066899969999966 | F | F | F |
| 0.8353530317033269 | 0.3348539520062964 | 0.2121426229776913 | T | T | T |
| 0.1111000029999971 | 0.5555499789999985 | 0.0018000000000029 | F | F | F |
| 0.0555500019999968 | 0.6111099720000013 | 0.1066899969999966 | F | F | F |
| 0.0008790447107173 | 0.5006173025169007 | 0.2117175604609897 | T | T | T |
| 0.2777900099999968 | 0.5555700059999964 | 0.0017899999999997 | F | F | F |
| 0.2222100050000009 | 0.6111000180000019 | 0.1066799979999971 | F | F | F |
| 0.1664349816335461 | 0.5002341947957840 | 0.2118088353979548 | T | T | T |
| 0.4444499909999990 | 0.5555499789999985 | 0.0018000000000029 | F | F | F |
| 0.3888899980000033 | 0.6111099720000013 | 0.1066799979999971 | F | F | F |
| 0.3322757504851381 | 0.5005283498021137 | 0.2110096211677610 | T | T | T |
| 0.6111000180000019 | 0.5555499789999985 | 0.0018000000000029 | F | F | F |
| 0.5555499789999985 | 0.6111099720000013 | 0.1066899969999966 | F | F | F |
| 0.5004851176337607 | 0.5035832545786596 | 0.2132449645078544 | T | T | T |
| 0.7777900099999968 | 0.5555700059999964 | 0.0017899999999997 | F | F | F |
| 0.7222099900000032 | 0.6111000180000019 | 0.1066799979999971 | F | F | F |
| 0.6712230668494091 | 0.5015687324641254 | 0.2078430829940318 | T | T | T |
| 0.9444500210000015 | 0.5555499789999985 | 0.0018000000000029 | F | F | F |
| 0.8888900279999987 | 0.6111099720000013 | 0.1066799979999971 | F | F | F |
| 0.8361914198639238 | 0.4998611313783220 | 0.2108270711864826 | T | T | T |
| 0.1111199999999997 | 0.7222399710000005 | 0.0018099999999990 | F | F | F |
| 0.0555599999999998 | 0.7777799959999996 | 0.1067200009999993 | F | F | F |
| 0.9997066144197231 | 0.6668402502586800 | 0.2113685769206660 | T | T | T |
| 0.2777900099999968 | 0.7222099900000032 | 0.0017899999999997 | F | F | F |
| 0.2222200040000004 | 0.7777799959999996 | 0.1067200009999993 | F | F | F |
| 0.1659328414452469 | 0.6658420809790493 | 0.2118104740875847 | T | T | T |
| 0.4444299939999965 | 0.7222200040000004 | 0.0017899999999997 | F | F | F |

|                    |                    |                    |   |   |   |
|--------------------|--------------------|--------------------|---|---|---|
| 0.3889000120000006 | 0.7777900099999968 | 0.1066799979999971 | F | F | F |
| 0.3317842583227685 | 0.6663712175688887 | 0.2115614685765069 | T | T | T |
| 0.6111199859999985 | 0.7222399710000005 | 0.0018099999999990 | F | F | F |
| 0.5555599930000028 | 0.7777799959999996 | 0.1067200009999993 | F | F | F |
| 0.4972395555980660 | 0.6679713788631665 | 0.2111019192515036 | T | T | T |
| 0.7777799959999996 | 0.7222200040000004 | 0.0017899999999997 | F | F | F |
| 0.7222200040000004 | 0.7777799959999996 | 0.1067200009999993 | F | F | F |
| 0.6662156308923322 | 0.6740449538844155 | 0.2193706731845465 | T | T | T |
| 0.9444299940000036 | 0.7222099900000032 | 0.0017899999999997 | F | F | F |
| 0.8888999819999981 | 0.7777900099999968 | 0.1066799979999971 | F | F | F |
| 0.8320122391128816 | 0.6674908520935708 | 0.2191308588969826 | T | T | T |
| 0.1111199999999997 | 0.8888800140000015 | 0.0018099999999990 | F | F | F |
| 0.0555500019999968 | 0.9444400069999972 | 0.1067000030000003 | F | F | F |
| 0.0002328873678070 | 0.8334909999191884 | 0.2112029094609731 | T | T | T |
| 0.2777599989999970 | 0.8888800140000015 | 0.0018099999999990 | F | F | F |
| 0.2222200040000004 | 0.9444400069999972 | 0.1067200009999993 | F | F | F |
| 0.1642474166162961 | 0.8299063135697218 | 0.2111114637809395 | T | T | T |
| 0.4444499909999990 | 0.8888999819999981 | 0.0018000000000029 | F | F | F |
| 0.3888899980000033 | 0.9444500210000015 | 0.1066899969999966 | F | F | F |
| 0.3314167221306649 | 0.8312476864430202 | 0.2116681922650303 | T | T | T |
| 0.6111199859999985 | 0.8888800140000015 | 0.0018099999999990 | F | F | F |
| 0.5555499789999985 | 0.9444500210000015 | 0.1066899969999966 | F | F | F |
| 0.4979186371695013 | 0.8316893487625127 | 0.2110309253492171 | T | T | T |
| 0.7777600289999995 | 0.8888800140000015 | 0.0018099999999990 | F | F | F |
| 0.7222200040000004 | 0.9444299940000036 | 0.1067200009999993 | F | F | F |
| 0.6653110924952879 | 0.8340465671367272 | 0.2095976196520526 | T | T | T |
| 0.9444500210000015 | 0.8888999819999981 | 0.0018000000000029 | F | F | F |
| 0.8888900279999987 | 0.9444500210000015 | 0.1067000030000003 | F | F | F |
| 0.8352905830973070 | 0.8361148440789463 | 0.2104693042640024 | T | T | T |
| 0.3862099950000015 | 0.0252100009999978 | 0.3365699949999978 | F | F | F |
| 0.6221731185075724 | 0.2437077045813594 | 0.3369433164743027 | T | T | T |
| 0.6537299749999974 | 0.0397999990000031 | 0.3406400080000012 | F | F | F |
| 0.4810299869999994 | 0.1689800019999979 | 0.3683600130000002 | T | T | T |
| 0.6999099849999979 | 0.1711699960000033 | 0.3778100010000003 | T | T | T |
| 0.5097600220000018 | 0.9990599750000015 | 0.3261699970000009 | F | F | F |
| 0.2878499930000018 | 0.0602600019999997 | 0.2814300060000008 | F | F | F |
| 0.7732499840000031 | 0.0595900009999966 | 0.2837100030000030 | F | F | F |
| 0.6486700179999971 | 0.9545300010000020 | 0.4026600119999983 | F | F | F |
| 0.3127700089999976 | 0.9412000180000035 | 0.4012300070000023 | F | F | F |
| 0.7032862864302838 | 0.3492549164621314 | 0.4069131983329253 | T | T | T |
| 0.7099285656661246 | 0.6829788076919262 | 0.3245855065134754 | T | T | T |
| 0.5995841862116654 | 0.6278549667157127 | 0.3236969703240148 | T | T | T |
| 0.5411167516451401 | 0.5168026214205529 | 0.3155487218686217 | T | T | T |
| 0.5948499559654714 | 0.4602479113109507 | 0.2990818454653492 | T | T | T |

|                    |                    |                    |   |   |   |
|--------------------|--------------------|--------------------|---|---|---|
| 0.7070915367233528 | 0.5164151891395609 | 0.3106902204918280 | T | T | T |
| 0.7654021085514037 | 0.6271059702749379 | 0.3216948675289670 | T | T | T |
| 0.7500438908205896 | 0.7626189726510527 | 0.3435752572805348 | T | T | T |
| 0.5592120326514898 | 0.6673951771944857 | 0.3424277336310372 | T | T | T |
| 0.4633138007678085 | 0.4754315554289547 | 0.3380906880429610 | T | T | T |
| 0.8407457443203253 | 0.6606033745699894 | 0.3477453382983371 | T | T | T |
| 0.6821917643357583 | 0.4009967537666532 | 0.4131436691848241 | T | T | T |
| 0.7472809725660863 | 0.4739677111724031 | 0.3230259763841382 | T | T | T |
| 0.3895241504617983 | 0.2847527616849130 | 0.2651908027619978 | T | T | T |

phenyl\_hy\_mo3o7\_ts

1.0000000000000000

14.9507999419999997 0.0000000000000000 0.0000000000000000

-7.4753999709999999 12.9477725567000004 0.0000000000000000

0.0000000000000000 0.0000000000000000 19.0690994262999993

Ni Mo O C H

108 3 8 6 7

Selective dynamics

Direct

|                    |                    |                    |   |   |   |
|--------------------|--------------------|--------------------|---|---|---|
| 0.1111000100000012 | 0.0555500099999975 | 0.0018000000000029 | F | F | F |
| 0.0555500099999975 | 0.1111100099999973 | 0.1066900000000004 | F | F | F |
| 0.0014557599999989 | 0.0011441700000034 | 0.2110684399999982 | T | T | T |
| 0.2777900299999985 | 0.0555700000000030 | 0.0017899999999997 | F | F | F |
| 0.2222099999999969 | 0.1111000100000012 | 0.1066799999999972 | F | F | F |
| 0.1658205399999986 | 0.0001313699999983 | 0.2164356899999973 | T | T | T |
| 0.4444499800000017 | 0.0555500099999975 | 0.0018000000000029 | F | F | F |
| 0.3889000200000012 | 0.1111100099999973 | 0.1066799999999972 | F | F | F |
| 0.3331058600000034 | 0.9967067299999997 | 0.2105973299999988 | T | T | T |
| 0.6111000499999975 | 0.0555500099999975 | 0.0018000000000029 | F | F | F |
| 0.5555499999999967 | 0.1111100099999973 | 0.1066999999999965 | F | F | F |
| 0.4998507299999986 | 0.9999500200000000 | 0.2203216099999992 | T | T | T |
| 0.7777900099999968 | 0.0555700000000030 | 0.0017899999999997 | F | F | F |
| 0.7222099999999969 | 0.1111000100000012 | 0.1066799999999972 | F | F | F |
| 0.6633945600000004 | 0.9986399100000014 | 0.2117485699999975 | T | T | T |
| 0.9444500199999979 | 0.0555500099999975 | 0.0018000000000029 | F | F | F |
| 0.8888900199999981 | 0.1111000100000012 | 0.1066799999999972 | F | F | F |
| 0.8360020599999984 | 0.0006441800000019 | 0.2152511700000019 | T | T | T |
| 0.1111200100000005 | 0.2222400100000002 | 0.0018099999999990 | F | F | F |
| 0.0555599999999998 | 0.2777799999999999 | 0.1067200000000028 | F | F | F |
| 0.0036752700000022 | 0.1692055199999984 | 0.2110451400000031 | T | T | T |
| 0.2777900299999985 | 0.2222200200000017 | 0.0017899999999997 | F | F | F |
| 0.2222199899999993 | 0.2777799999999999 | 0.1067200000000028 | F | F | F |
| 0.1666486900000024 | 0.1692423100000013 | 0.2109526500000030 | T | T | T |
| 0.4444299999999970 | 0.2222100199999986 | 0.0017899999999997 | F | F | F |
| 0.3889000100000004 | 0.2777900199999976 | 0.1066799999999972 | F | F | F |
| 0.3385442100000020 | 0.1736087900000030 | 0.2155860100000027 | T | T | T |
| 0.6111200100000005 | 0.2222400100000002 | 0.0018099999999990 | F | F | F |
| 0.5555599999999998 | 0.2777799999999999 | 0.1067200000000028 | F | F | F |
| 0.5038784600000028 | 0.1711054700000005 | 0.2103911100000033 | T | T | T |
| 0.7777799899999991 | 0.2222100199999986 | 0.0017899999999997 | F | F | F |
| 0.7222200300000026 | 0.2777799999999999 | 0.1067200000000028 | F | F | F |
| 0.6669609300000019 | 0.1704645900000017 | 0.2117695000000026 | T | T | T |
| 0.9444299600000008 | 0.2222100199999986 | 0.0017899999999997 | F | F | F |
| 0.8888999500000025 | 0.2777900199999976 | 0.1066799999999972 | F | F | F |

|                    |                    |                    |   |   |   |
|--------------------|--------------------|--------------------|---|---|---|
| 0.8360081599999987 | 0.1711389800000021 | 0.2144006999999988 | T | T | T |
| 0.1111199999999997 | 0.3888800200000020 | 0.0018099999999990 | F | F | F |
| 0.0555600100000007 | 0.4444500199999979 | 0.1066900000000004 | F | F | F |
| 0.0014664199999999 | 0.3345616300000032 | 0.2113268900000023 | T | T | T |
| 0.2777600000000007 | 0.3888800200000020 | 0.0018099999999990 | F | F | F |
| 0.2222200200000017 | 0.4444400400000035 | 0.1067200000000028 | F | F | F |
| 0.1678807500000019 | 0.3350091399999968 | 0.2118235100000021 | T | T | T |
| 0.4444499800000017 | 0.3889000100000004 | 0.0018000000000029 | F | F | F |
| 0.3888900199999981 | 0.4444500199999979 | 0.1066900000000004 | F | F | F |
| 0.3342407499999993 | 0.3345207500000029 | 0.2110418500000009 | T | T | T |
| 0.6111199999999997 | 0.3888800200000020 | 0.0018099999999990 | F | F | F |
| 0.5555600400000031 | 0.4444500199999979 | 0.1066900000000004 | F | F | F |
| 0.5086861400000018 | 0.3431860299999983 | 0.2349448399999972 | T | T | T |
| 0.7777600200000023 | 0.3888800200000020 | 0.0018099999999990 | F | F | F |
| 0.7222200200000017 | 0.4444400400000035 | 0.1067200000000028 | F | F | F |
| 0.6699927000000017 | 0.3327299999999980 | 0.2127561499999970 | T | T | T |
| 0.9444500399999995 | 0.3889000100000004 | 0.0018000000000029 | F | F | F |
| 0.8888900399999997 | 0.4444500199999979 | 0.1066900000000004 | F | F | F |
| 0.8355778900000033 | 0.3349299300000013 | 0.2121868099999986 | T | T | T |
| 0.1110999899999996 | 0.5555499800000021 | 0.0018000000000029 | F | F | F |
| 0.0555499900000029 | 0.6111099999999965 | 0.1066900000000004 | F | F | F |
| 0.0011086800000015 | 0.5006001100000006 | 0.2117402399999975 | T | T | T |
| 0.2777900099999968 | 0.5555700099999967 | 0.0017899999999997 | F | F | F |
| 0.2222099999999969 | 0.6111000499999975 | 0.1066799999999972 | F | F | F |
| 0.1665257399999973 | 0.5001438399999998 | 0.2118145100000035 | T | T | T |
| 0.4444499700000009 | 0.5555499800000021 | 0.0018000000000029 | F | F | F |
| 0.3888900000000035 | 0.6111099999999965 | 0.1066799999999972 | F | F | F |
| 0.3320421000000024 | 0.5004447299999981 | 0.2109945400000015 | T | T | T |
| 0.6111000399999966 | 0.5555499800000021 | 0.0018000000000029 | F | F | F |
| 0.5555499900000029 | 0.6111099999999965 | 0.1066900000000004 | F | F | F |
| 0.4998709700000035 | 0.5046946200000022 | 0.2119985200000016 | T | T | T |
| 0.7777900099999968 | 0.5555700099999967 | 0.0017899999999997 | F | F | F |
| 0.7222099800000024 | 0.6111000499999975 | 0.1066799999999972 | F | F | F |
| 0.6716464799999997 | 0.5016687700000020 | 0.2082029600000013 | T | T | T |
| 0.9444500299999987 | 0.5555499800000021 | 0.0018000000000029 | F | F | F |
| 0.8888900000000035 | 0.6111099999999965 | 0.1066799999999972 | F | F | F |
| 0.8366056600000036 | 0.4999613600000004 | 0.2105051300000014 | T | T | T |
| 0.1111200200000013 | 0.7222400100000002 | 0.0018099999999990 | F | F | F |
| 0.0555599999999998 | 0.7777799999999999 | 0.1067200000000028 | F | F | F |
| 0.9998770699999966 | 0.6667672999999965 | 0.2114386100000019 | T | T | T |
| 0.2777900500000001 | 0.7222100400000002 | 0.0017899999999997 | F | F | F |
| 0.2222199899999993 | 0.7777799999999999 | 0.1067200000000028 | F | F | F |
| 0.1659792499999995 | 0.6657452600000013 | 0.2118418100000028 | T | T | T |
| 0.4444300099999978 | 0.7222200499999971 | 0.0017899999999997 | F | F | F |

|                    |                    |                    |   |   |   |
|--------------------|--------------------|--------------------|---|---|---|
| 0.3889000100000004 | 0.7777900099999968 | 0.1066799999999972 | F | F | F |
| 0.3318237399999973 | 0.6664642599999979 | 0.2115940799999976 | T | T | T |
| 0.6111200400000030 | 0.7222400100000002 | 0.0018099999999990 | F | F | F |
| 0.5555599999999998 | 0.7777799999999999 | 0.1067200000000028 | F | F | F |
| 0.4974743699999991 | 0.6687312399999996 | 0.2110581600000003 | T | T | T |
| 0.7777800300000024 | 0.7222200499999971 | 0.0017899999999997 | F | F | F |
| 0.7222199899999993 | 0.7777799999999999 | 0.1067200000000028 | F | F | F |
| 0.6670484300000012 | 0.6754306600000035 | 0.2185694799999993 | T | T | T |
| 0.9444300099999978 | 0.7222100400000002 | 0.0017899999999997 | F | F | F |
| 0.8888999500000025 | 0.7777900099999968 | 0.1066799999999972 | F | F | F |
| 0.8321359799999968 | 0.6668900900000025 | 0.2190026299999985 | T | T | T |
| 0.1111200599999975 | 0.8888800699999990 | 0.0018099999999990 | F | F | F |
| 0.0555499999999967 | 0.9444400100000010 | 0.1066999999999965 | F | F | F |
| 0.0004127600000032 | 0.8335359000000011 | 0.2112081900000007 | T | T | T |
| 0.2777600499999977 | 0.8888800699999990 | 0.0018099999999990 | F | F | F |
| 0.2222200100000009 | 0.9444400100000010 | 0.1067200000000028 | F | F | F |
| 0.1642963399999999 | 0.8297078900000017 | 0.2111478500000032 | T | T | T |
| 0.4444500199999979 | 0.8889000300000021 | 0.0018000000000029 | F | F | F |
| 0.3888900099999972 | 0.9444500299999987 | 0.1066900000000004 | F | F | F |
| 0.3314211900000004 | 0.8311310400000025 | 0.2117172299999979 | T | T | T |
| 0.6111200599999975 | 0.8888800699999990 | 0.0018099999999990 | F | F | F |
| 0.5555499999999967 | 0.9444500299999987 | 0.1066900000000004 | F | F | F |
| 0.4980013899999989 | 0.8321820099999968 | 0.2109832100000020 | T | T | T |
| 0.7777600800000002 | 0.8888800699999990 | 0.0018099999999990 | F | F | F |
| 0.7222200100000009 | 0.9444299999999970 | 0.1067200000000028 | F | F | F |
| 0.6656162700000010 | 0.8349505199999996 | 0.2094742000000025 | T | T | T |
| 0.9444500500000004 | 0.8889000300000021 | 0.0018000000000029 | F | F | F |
| 0.8888900099999972 | 0.9444500299999987 | 0.1066999999999965 | F | F | F |
| 0.8357497499999980 | 0.8365642799999975 | 0.2104348599999994 | T | T | T |
| 0.3862100200000000 | 0.0252100000000013 | 0.3365699900000010 | F | F | F |
| 0.6220086900000013 | 0.2422610899999995 | 0.3347921200000030 | T | T | T |
| 0.6537300299999984 | 0.0397999999999996 | 0.3406400000000005 | F | F | F |
| 0.4816168700000034 | 0.1682398399999983 | 0.3672502900000012 | T | T | T |
| 0.6944329100000033 | 0.1673375600000000 | 0.3780177100000017 | T | T | T |
| 0.5097600699999987 | 0.9990600400000034 | 0.3261699899999968 | F | F | F |
| 0.2878499799999972 | 0.0602600100000004 | 0.2814300000000003 | F | F | F |
| 0.7732499899999965 | 0.0595900000000000 | 0.2837099999999992 | F | F | F |
| 0.6486699900000019 | 0.9545300099999992 | 0.4026600099999982 | F | F | F |
| 0.3127700200000021 | 0.9412000599999999 | 0.4012300099999990 | F | F | F |
| 0.7025749499999989 | 0.3471607099999972 | 0.4057061600000011 | T | T | T |
| 0.7131938899999994 | 0.6843581199999988 | 0.3230568700000020 | T | T | T |
| 0.6031498199999987 | 0.6371061999999981 | 0.3224071599999974 | T | T | T |
| 0.5369022300000026 | 0.5265922199999977 | 0.3142591499999980 | T | T | T |
| 0.5836429499999980 | 0.4638788099999971 | 0.2968238999999997 | T | T | T |

|                    |                    |                    |   |   |   |
|--------------------|--------------------|--------------------|---|---|---|
| 0.6947888500000019 | 0.5103589900000003 | 0.3110384200000027 | T | T | T |
| 0.7606236800000019 | 0.6208304900000030 | 0.3206326500000003 | T | T | T |
| 0.7590739199999987 | 0.7638857299999984 | 0.3416930200000010 | T | T | T |
| 0.5689149999999970 | 0.6821876899999992 | 0.3418040999999974 | T | T | T |
| 0.4598584700000004 | 0.4907162599999992 | 0.3376910599999974 | T | T | T |
| 0.8355555099999989 | 0.6488504300000031 | 0.3464555300000001 | T | T | T |
| 0.6805287700000022 | 0.3974245599999975 | 0.4152408100000002 | T | T | T |
| 0.7282341299999970 | 0.4623943499999967 | 0.3250411100000008 | T | T | T |
| 0.4700744200000031 | 0.3301677099999978 | 0.3077476300000015 | T | T | T |

phenol\_ddo\_ni\_is

1.0000000000000000  
14.9507999419999997 0.0000000000000000 0.0000000000000000  
-7.4753999709999999 12.9477725567000004 0.0000000000000000  
0.0000000000000000 0.0000000000000000 19.0690994262999993

Ni C O H  
108 6 1 6

Selective dynamics

Direct

|                     |                     |                    |   |   |   |
|---------------------|---------------------|--------------------|---|---|---|
| 0.1111000029999971  | 0.0555500019999968  | 0.0018000000000029 | F | F | F |
| 0.0555500019999968  | 0.1111100019999967  | 0.1066899969999966 | F | F | F |
| -0.0005329841437689 | -0.0000012467488876 | 0.2117315852117488 | T | T | T |
| 0.2777900099999968  | 0.0555699989999994  | 0.0017899999999997 | F | F | F |
| 0.2222100050000009  | 0.1111000029999971  | 0.1066799979999971 | F | F | F |
| 0.1651946797346125  | -0.0014316527100392 | 0.2116951815427599 | T | T | T |
| 0.4444499909999990  | 0.0555500019999968  | 0.0018000000000029 | F | F | F |
| 0.3889000120000006  | 0.1111100019999967  | 0.1066799979999971 | F | F | F |
| 0.3321423539260487  | -0.0020914219177893 | 0.2115958674664416 | T | T | T |
| 0.6111000180000019  | 0.0555500019999968  | 0.0018000000000029 | F | F | F |
| 0.5555499789999985  | 0.1111100019999967  | 0.1067000030000003 | F | F | F |
| 0.4995998653165399  | -0.0012404389931363 | 0.2116316440024287 | T | T | T |
| 0.7777900099999968  | 0.0555699989999994  | 0.0017899999999997 | F | F | F |
| 0.7222099900000032  | 0.1111000029999971  | 0.1066799979999971 | F | F | F |
| 0.6663346098782704  | 0.0000209382101673  | 0.2117456436750079 | T | T | T |
| 0.9444500210000015  | 0.0555500019999968  | 0.0018000000000029 | F | F | F |
| 0.8888900279999987  | 0.1111000029999971  | 0.1066799979999971 | F | F | F |
| 0.8330232909209696  | 0.0003702634004084  | 0.2117262708838012 | T | T | T |
| 0.1111199999999997  | 0.2222400010000030  | 0.0018099999999990 | F | F | F |
| 0.0555599999999998  | 0.2777799959999996  | 0.1067200009999993 | F | F | F |
| 0.9991955293075088  | 0.1666621291434260  | 0.2117429661132614 | T | T | T |
| 0.2777900099999968  | 0.2222200040000004  | 0.0017899999999997 | F | F | F |
| 0.2222200040000004  | 0.2777799959999996  | 0.1067200009999993 | F | F | F |
| 0.1645096851227806  | 0.1654198721798625  | 0.2114734660113819 | T | T | T |
| 0.4444299939999965  | 0.2222100050000009  | 0.0017899999999997 | F | F | F |
| 0.3889000120000006  | 0.2777900099999968  | 0.1066799979999971 | F | F | F |
| 0.3287797950074930  | 0.1618967802426570  | 0.2102934426119678 | T | T | T |
| 0.6111199859999985  | 0.2222400010000030  | 0.0018099999999990 | F | F | F |
| 0.5555599930000028  | 0.2777799959999996  | 0.1067200009999993 | F | F | F |
| 0.4981291209853778  | 0.1627637891164883  | 0.2106272942975817 | T | T | T |
| 0.7777799959999996  | 0.2222100050000009  | 0.0017899999999997 | F | F | F |
| 0.7222200040000004  | 0.2777799959999996  | 0.1067200009999993 | F | F | F |
| 0.6662324111233084  | 0.1662795741180194  | 0.2111192281838024 | T | T | T |
| 0.9444299940000036  | 0.2222100050000009  | 0.0017899999999997 | F | F | F |
| 0.8888999819999981  | 0.2777900099999968  | 0.1066799979999971 | F | F | F |



|                     |                    |                    |   |   |   |
|---------------------|--------------------|--------------------|---|---|---|
| 0.8328013961554740  | 0.1668985261325932 | 0.2116354172258665 | T | T | T |
| 0.1111199999999997  | 0.3888800140000015 | 0.0018099999999990 | F | F | F |
| 0.0555599999999998  | 0.4444499909999990 | 0.1066899969999966 | F | F | F |
| -0.0003674639695729 | 0.3333906060892391 | 0.2117371232327657 | T | T | T |
| 0.2777599989999970  | 0.3888800140000015 | 0.0018099999999990 | F | F | F |
| 0.2222200040000004  | 0.4444400069999972 | 0.1067200009999993 | F | F | F |
| 0.1654322691765739  | 0.3329913405516554 | 0.2118287049153248 | T | T | T |
| 0.4444499909999990  | 0.3889000120000006 | 0.0018000000000029 | F | F | F |
| 0.3888899980000033  | 0.4444499909999990 | 0.1066899969999966 | F | F | F |
| 0.3293713132373607  | 0.3312849844174846 | 0.2090564032697135 | T | T | T |
| 0.6111199859999985  | 0.3888800140000015 | 0.0018099999999990 | F | F | F |
| 0.5555599930000028  | 0.4444499909999990 | 0.1066899969999966 | F | F | F |
| 0.4929378282324274  | 0.3256327198354657 | 0.2178331129438440 | T | T | T |
| 0.7777600289999995  | 0.3888800140000015 | 0.0018099999999990 | F | F | F |
| 0.7222200040000004  | 0.4444400069999972 | 0.1067200009999993 | F | F | F |
| 0.6650735211569074  | 0.3336807025057799 | 0.2170432458248779 | T | T | T |
| 0.9444500210000015  | 0.3889000120000006 | 0.0018000000000029 | F | F | F |
| 0.8888900279999987  | 0.4444499909999990 | 0.1066899969999966 | F | F | F |
| 0.8332348598307234  | 0.3334334294876294 | 0.2111471090419994 | T | T | T |
| 0.1111000029999971  | 0.5555499789999985 | 0.0018000000000029 | F | F | F |
| 0.0555500019999968  | 0.6111099720000013 | 0.1066899969999966 | F | F | F |
| 0.0007574885197328  | 0.5000728943369955 | 0.2116072005859533 | T | T | T |
| 0.2777900099999968  | 0.5555700059999964 | 0.0017899999999997 | F | F | F |
| 0.2222100050000009  | 0.6111000180000019 | 0.1066799979999971 | F | F | F |
| 0.1666284386521929  | 0.4996369756751705 | 0.2117695991863569 | T | T | T |
| 0.4444499909999990  | 0.5555499789999985 | 0.0018000000000029 | F | F | F |
| 0.3888899980000033  | 0.6111099720000013 | 0.1066799979999971 | F | F | F |
| 0.3329309138619956  | 0.4996804900782454 | 0.2114034785380957 | T | T | T |
| 0.6111000180000019  | 0.5555499789999985 | 0.0018000000000029 | F | F | F |
| 0.5555499789999985  | 0.6111099720000013 | 0.1066899969999966 | F | F | F |
| 0.4998123466447409  | 0.4981442444046062 | 0.2175016656838004 | T | T | T |
| 0.7777900099999968  | 0.5555700059999964 | 0.0017899999999997 | F | F | F |
| 0.7222099900000032  | 0.6111000180000019 | 0.1066799979999971 | F | F | F |
| 0.6727399696681644  | 0.5060395930952682 | 0.2171879698444692 | T | T | T |
| 0.9444500210000015  | 0.5555499789999985 | 0.0018000000000029 | F | F | F |
| 0.8888900279999987  | 0.6111099720000013 | 0.1066799979999971 | F | F | F |
| 0.8363686687361466  | 0.5012406342256073 | 0.2105963852329234 | T | T | T |
| 0.1111199999999997  | 0.7222399710000005 | 0.0018099999999990 | F | F | F |
| 0.0555599999999998  | 0.7777799959999996 | 0.1067200009999993 | F | F | F |
| 0.0013787361294861  | 0.6673461981431409 | 0.2116082766828282 | T | T | T |
| 0.2777900099999968  | 0.7222099900000032 | 0.0017899999999997 | F | F | F |
| 0.2222200040000004  | 0.7777799959999996 | 0.1067200009999993 | F | F | F |
| 0.1671058328323230  | 0.6663608429950104 | 0.2117075281998675 | T | T | T |
| 0.4444299939999965  | 0.7222200040000004 | 0.0017899999999997 | F | F | F |

|                    |                    |                    |   |   |   |
|--------------------|--------------------|--------------------|---|---|---|
| 0.3889000120000006 | 0.7777900099999968 | 0.1066799979999971 | F | F | F |
| 0.3334772862268288 | 0.6661176116578379 | 0.2116709675065878 | T | T | T |
| 0.6111199859999985 | 0.7222399710000005 | 0.0018099999999990 | F | F | F |
| 0.5555599930000028 | 0.7777799959999996 | 0.1067200009999993 | F | F | F |
| 0.4997239292908008 | 0.6665303162147956 | 0.2111456296334315 | T | T | T |
| 0.7777799959999996 | 0.7222200040000004 | 0.0017899999999997 | F | F | F |
| 0.7222200040000004 | 0.7777799959999996 | 0.1067200009999993 | F | F | F |
| 0.6680125298327908 | 0.6695199423828850 | 0.2105918249153314 | T | T | T |
| 0.9444299940000036 | 0.7222099900000032 | 0.0017899999999997 | F | F | F |
| 0.8888999819999981 | 0.7777900099999968 | 0.1066799979999971 | F | F | F |
| 0.8370613846498931 | 0.6703836741139345 | 0.2102077128022923 | T | T | T |
| 0.1111199999999997 | 0.8888800140000015 | 0.0018099999999990 | F | F | F |
| 0.0555500019999968 | 0.9444400069999972 | 0.1067000030000003 | F | F | F |
| 0.0006104552715126 | 0.8340101827165372 | 0.2117080893897990 | T | T | T |
| 0.2777599989999970 | 0.8888800140000015 | 0.0018099999999990 | F | F | F |
| 0.2222200040000004 | 0.9444400069999972 | 0.1067200009999993 | F | F | F |
| 0.1666300845584220 | 0.8328428489162326 | 0.2117522839891554 | T | T | T |
| 0.4444499909999990 | 0.8888999819999981 | 0.0018000000000029 | F | F | F |
| 0.3888899980000033 | 0.9444500210000015 | 0.1066899969999966 | F | F | F |
| 0.3333627726005416 | 0.8325532372276516 | 0.2117181091244830 | T | T | T |
| 0.6111199859999985 | 0.8888800140000015 | 0.0018099999999990 | F | F | F |
| 0.5555499789999985 | 0.9444500210000015 | 0.1066899969999966 | F | F | F |
| 0.5000630277481721 | 0.8330262005755398 | 0.2117400557262546 | T | T | T |
| 0.7777600289999995 | 0.8888800140000015 | 0.0018099999999990 | F | F | F |
| 0.7222200040000004 | 0.9444299940000036 | 0.1067200009999993 | F | F | F |
| 0.6666994022815081 | 0.8339604666615318 | 0.2115972220655386 | T | T | T |
| 0.9444500210000015 | 0.8888999819999981 | 0.0018000000000029 | F | F | F |
| 0.8888900279999987 | 0.9444500210000015 | 0.1067000030000003 | F | F | F |
| 0.8340294648203086 | 0.8346878844108372 | 0.2116204987342153 | T | T | T |
| 0.6898971965719799 | 0.4687725776725017 | 0.3204954650721050 | T | T | T |
| 0.6353927096334619 | 0.5248171511651050 | 0.3198904125383493 | T | T | T |
| 0.5231899873528140 | 0.4717893584285495 | 0.3209057486003030 | T | T | T |
| 0.4693554113043996 | 0.3602408757308522 | 0.3262697984506484 | T | T | T |
| 0.5226940623091063 | 0.3035795857785751 | 0.3227756495894712 | T | T | T |
| 0.6346276011434646 | 0.3571554473843675 | 0.3201184184564035 | T | T | T |
| 0.3698152303411883 | 0.3075386525695408 | 0.3505970529315081 | T | T | T |
| 0.7708925436274110 | 0.5088789452424258 | 0.3366405338754780 | T | T | T |
| 0.6762443000005885 | 0.6057660263097592 | 0.3363347381774914 | T | T | T |
| 0.4867227460049630 | 0.5108607397595079 | 0.3468341930913607 | T | T | T |
| 0.4809142020527290 | 0.2230815185183519 | 0.3401462241823400 | T | T | T |
| 0.6730230245853132 | 0.3173752875716149 | 0.3420129382314427 | T | T | T |
| 0.3334568764856957 | 0.3451222908105341 | 0.3380547205929304 | T | T | T |

phenol\_ddo\_ni\_ts

```
1.0000000000000000
14.9507999419999997 0.0000000000000000 0.0000000000000000
-7.4753999709999999 12.9477725567000004 0.0000000000000000
0.0000000000000000 0.0000000000000000 19.0690994262999993
```

```
Ni C O H
108 6 1 6
```

Selective dynamics

Direct

|                    |                    |                    |   |   |   |
|--------------------|--------------------|--------------------|---|---|---|
| 0.1111000060000009 | 0.0555500050000006 | 0.0018000000000029 | F | F | F |
| 0.0555500050000006 | 0.1111100090000008 | 0.1066900009999969 | F | F | F |
| 1.0003096496023427 | 1.0005369850626871 | 0.2116846414102837 | T | T | T |
| 0.2777900250000016 | 0.0555700029999997 | 0.0017899999999997 | F | F | F |
| 0.2222099950000000 | 0.1111000100000012 | 0.1066799990000007 | F | F | F |
| 0.1656220657222694 | 0.9986157858829724 | 0.2116377396367100 | T | T | T |
| 0.4444499829999984 | 0.0555500050000006 | 0.0018000000000029 | F | F | F |
| 0.3889000220000014 | 0.1111100090000008 | 0.1066799990000007 | F | F | F |
| 0.3324626553336416 | 0.9977396352174649 | 0.2116099108744670 | T | T | T |
| 0.6111000539999978 | 0.0555500050000006 | 0.0018000000000029 | F | F | F |
| 0.5555499970000000 | 0.1111100090000008 | 0.1067000039999968 | F | F | F |
| 0.4999808405279580 | 0.9986813137269259 | 0.2116806573624850 | T | T | T |
| 0.7777900090000003 | 0.0555700029999997 | 0.0017899999999997 | F | F | F |
| 0.7222099950000000 | 0.1111000100000012 | 0.1066799990000007 | F | F | F |
| 0.6668868000843682 | 0.0003114153301686 | 0.2117492185122321 | T | T | T |
| 0.9444500150000010 | 0.0555500050000006 | 0.0018000000000029 | F | F | F |
| 0.8888900150000012 | 0.1111000100000012 | 0.1066799990000007 | F | F | F |
| 0.8336922948174545 | 1.0007030570514783 | 0.2117735045419174 | T | T | T |
| 0.1111200080000003 | 0.2222400149999970 | 0.0018099999999990 | F | F | F |
| 0.0555599959999995 | 0.2777799990000034 | 0.1067199960000025 | F | F | F |
| 1.0001112471032847 | 0.1669486217733283 | 0.2115579319614322 | T | T | T |
| 0.2777900279999983 | 0.2222200180000016 | 0.0017899999999997 | F | F | F |
| 0.2222199939999996 | 0.2777799990000034 | 0.1067199960000025 | F | F | F |
| 0.1665996067017849 | 0.1667066751085969 | 0.2116969808277427 | T | T | T |
| 0.4444299970000003 | 0.2222100190000020 | 0.0017899999999997 | F | F | F |
| 0.3889000149999973 | 0.2777900159999973 | 0.1066799990000007 | F | F | F |
| 0.3293975190436174 | 0.1606801202429265 | 0.2097864103492250 | T | T | T |
| 0.6111200080000003 | 0.2222400149999970 | 0.0018099999999990 | F | F | F |
| 0.5555600040000002 | 0.2777799990000034 | 0.1067199960000025 | F | F | F |
| 0.4990607638814936 | 0.1620627975896592 | 0.2103469609454115 | T | T | T |
| 0.7777799899999991 | 0.2222100190000020 | 0.0017899999999997 | F | F | F |
| 0.7222200260000022 | 0.2777799990000034 | 0.1067199960000025 | F | F | F |
| 0.6669774057483052 | 0.1664683520313431 | 0.2113325307609098 | T | T | T |
| 0.9444299649999977 | 0.2222100190000020 | 0.0017899999999997 | F | F | F |
| 0.8888999509999991 | 0.2777900159999973 | 0.1066799990000007 | F | F | F |

|                    |                    |                    |   |   |   |
|--------------------|--------------------|--------------------|---|---|---|
| 0.8334755516851456 | 0.1669405207286504 | 0.2116952039648392 | T | T | T |
| 0.1111199970000030 | 0.3888800180000018 | 0.0018099999999990 | F | F | F |
| 0.0555600100000007 | 0.4444500159999976 | 0.1066900009999969 | F | F | F |
| 1.0001743163577845 | 0.3333997832424285 | 0.2117134263423464 | T | T | T |
| 0.2777600049999975 | 0.3888800180000018 | 0.0018099999999990 | F | F | F |
| 0.2222200180000016 | 0.4444400360000031 | 0.1067199960000025 | F | F | F |
| 0.1676747828957348 | 0.3335887826503767 | 0.2114284136807259 | T | T | T |
| 0.4444499760000014 | 0.3889000149999973 | 0.0018000000000029 | F | F | F |
| 0.3888900210000017 | 0.4444500159999976 | 0.1066900009999969 | F | F | F |
| 0.3375214615278581 | 0.3334783394069519 | 0.2372864665487273 | T | T | T |
| 0.6111199970000030 | 0.3888800180000018 | 0.0018099999999990 | F | F | F |
| 0.5555600420000033 | 0.4444500159999976 | 0.1066900009999969 | F | F | F |
| 0.4976326613152890 | 0.3269475415748467 | 0.2094011126672476 | T | T | T |
| 0.7777600209999989 | 0.3888800180000018 | 0.0018099999999990 | F | F | F |
| 0.7222200180000016 | 0.4444400360000031 | 0.1067199960000025 | F | F | F |
| 0.6645738859475649 | 0.3334047150440368 | 0.2185278392565175 | T | T | T |
| 0.9444500399999995 | 0.3889000149999973 | 0.0018000000000029 | F | F | F |
| 0.8888900370000030 | 0.4444500159999976 | 0.1066900009999969 | F | F | F |
| 0.8335144443063321 | 0.3334981581808328 | 0.2114328162671727 | T | T | T |
| 0.1110999939999999 | 0.5555499800000021 | 0.0018000000000029 | F | F | F |
| 0.0555499909999995 | 0.6111099980000034 | 0.1066900009999969 | F | F | F |
| 0.0007907965433425 | 0.4999550430482972 | 0.2117035891060289 | T | T | T |
| 0.2777900139999971 | 0.5555700139999971 | 0.0017899999999997 | F | F | F |
| 0.2222100010000005 | 0.6111000539999978 | 0.1066799990000007 | F | F | F |
| 0.1666183314570223 | 0.4999025713748979 | 0.2117136620732942 | T | T | T |
| 0.4444499700000009 | 0.5555499800000021 | 0.0018000000000029 | F | F | F |
| 0.3888900010000000 | 0.6111099980000034 | 0.1066799990000007 | F | F | F |
| 0.3325486995101440 | 0.5007929585516233 | 0.2105545816196748 | T | T | T |
| 0.6111000419999968 | 0.5555499800000021 | 0.0018000000000029 | F | F | F |
| 0.5555499909999995 | 0.6111099980000034 | 0.1066900009999969 | F | F | F |
| 0.5029962585017498 | 0.5032719909803198 | 0.2126606576361586 | T | T | T |
| 0.7777900139999971 | 0.5555700139999971 | 0.0017899999999997 | F | F | F |
| 0.7222099849999992 | 0.6111000539999978 | 0.1066799990000007 | F | F | F |
| 0.6743032030088373 | 0.5071196401811608 | 0.2193814351339267 | T | T | T |
| 0.9444500339999991 | 0.5555499800000021 | 0.0018000000000029 | F | F | F |
| 0.8888900010000000 | 0.6111099980000034 | 0.1066799990000007 | F | F | F |
| 0.8365901590285978 | 0.5011359389434320 | 0.2107510659988187 | T | T | T |
| 0.1111200229999980 | 0.7222400129999968 | 0.0018099999999990 | F | F | F |
| 0.0555600029999965 | 0.7777799959999996 | 0.1067199960000025 | F | F | F |
| 0.0013081430954706 | 0.6672120197006327 | 0.2116776672655951 | T | T | T |
| 0.2777900450000033 | 0.7222100350000034 | 0.0017899999999997 | F | F | F |
| 0.2222199930000031 | 0.7777799959999996 | 0.1067199960000025 | F | F | F |
| 0.1669405474828026 | 0.6664970379531584 | 0.2117834263609756 | T | T | T |
| 0.4444300070000011 | 0.7222200530000009 | 0.0017899999999997 | F | F | F |

|                    |                    |                    |   |   |   |
|--------------------|--------------------|--------------------|---|---|---|
| 0.3889000140000007 | 0.7777900139999971 | 0.1066799990000007 | F | F | F |
| 0.3333524744365177 | 0.6665690934587910 | 0.2117070054943833 | T | T | T |
| 0.6111200380000028 | 0.7222400129999968 | 0.0018099999999990 | F | F | F |
| 0.5555600029999965 | 0.7777799959999996 | 0.1067199960000025 | F | F | F |
| 0.5000980717884494 | 0.6680021087793400 | 0.2108998360581580 | T | T | T |
| 0.7777800309999989 | 0.7222200530000009 | 0.0017899999999997 | F | F | F |
| 0.7222199930000031 | 0.7777799959999996 | 0.1067199960000025 | F | F | F |
| 0.6691043370102027 | 0.6707654738368775 | 0.2107482472318355 | T | T | T |
| 0.9444300050000010 | 0.7222100350000034 | 0.0017899999999997 | F | F | F |
| 0.8888999500000025 | 0.7777900139999971 | 0.1066799990000007 | F | F | F |
| 0.8373768691414248 | 0.6704173279845214 | 0.2106201868894456 | T | T | T |
| 0.1111200550000007 | 0.8888800710000027 | 0.0018099999999990 | F | F | F |
| 0.0555500030000005 | 0.9444400149999979 | 0.1067000039999968 | F | F | F |
| 0.0008558304662948 | 0.8341718440891637 | 0.2117656971700852 | T | T | T |
| 0.2777600479999975 | 0.8888800710000027 | 0.0018099999999990 | F | F | F |
| 0.2222200080000007 | 0.9444400149999979 | 0.1067199960000025 | F | F | F |
| 0.1666514589208765 | 0.8327258381145679 | 0.2118333781362179 | T | T | T |
| 0.4444500159999976 | 0.8889000320000022 | 0.0018000000000029 | F | F | F |
| 0.3888900139999976 | 0.9444500319999989 | 0.1066900009999969 | F | F | F |
| 0.3332882025312198 | 0.8325629509400466 | 0.2117712181725380 | T | T | T |
| 0.6111200550000007 | 0.8888800710000027 | 0.0018099999999990 | F | F | F |
| 0.5555500039999970 | 0.9444500319999989 | 0.1066900009999969 | F | F | F |
| 0.5001652182499808 | 0.8334733618383373 | 0.2117988291172742 | T | T | T |
| 0.7777600800000002 | 0.8888800710000027 | 0.0018099999999990 | F | F | F |
| 0.7222200060000006 | 0.9444299979999968 | 0.1067199960000025 | F | F | F |
| 0.6672327176695610 | 0.8346648248309499 | 0.2116678805809035 | T | T | T |
| 0.9444500480000002 | 0.8889000320000022 | 0.0018000000000029 | F | F | F |
| 0.8888900139999976 | 0.9444500319999989 | 0.1067000039999968 | F | F | F |
| 0.8347264946532522 | 0.8352683950562910 | 0.2116297103577607 | T | T | T |
| 0.6747635317070537 | 0.4612361909848324 | 0.3236863775559755 | T | T | T |
| 0.6311863304799320 | 0.5273549240113469 | 0.3231704327585088 | T | T | T |
| 0.5210904546663625 | 0.4865797293535337 | 0.3146752653504725 | T | T | T |
| 0.4594397675476220 | 0.3778936458890326 | 0.2955745628628617 | T | T | T |
| 0.4982697859019121 | 0.3082125120069341 | 0.3128265182480143 | T | T | T |
| 0.6084637065290331 | 0.3504586939281349 | 0.3217397653530165 | T | T | T |
| 0.3041240054061333 | 0.3051393887221595 | 0.3351426175188859 | T | T | T |
| 0.7538495341704510 | 0.4923219874570532 | 0.3425681026370912 | T | T | T |
| 0.6777112078662306 | 0.6060799136906596 | 0.3432080298525974 | T | T | T |
| 0.4856557398411692 | 0.5265685390057731 | 0.3404024027804346 | T | T | T |
| 0.4450954958637064 | 0.2298128587247713 | 0.3311485388819347 | T | T | T |
| 0.6355106288817864 | 0.3022455780357956 | 0.3467138662634150 | T | T | T |
| 0.2991767491140296 | 0.3633841743536453 | 0.3541771448281846 | T | T | T |
